1 **Chrna5 is a marker of acetylcholine super-responder subplate**  
2 **neurons with specialized expression of nicotinic modulator**  
3 **proteins**

4  
5 Sridevi Venkatesan<sup>1</sup>, Tianhui Chen<sup>1</sup>, Yupeng Liu<sup>1</sup>, Eric E Turner<sup>2</sup>, Shreejoy  
6 Tripathy<sup>1,3,4,5</sup>, \*Evelyn K Lambe<sup>1,4,6</sup>

- 7  
8 1. Department of Physiology, Temerty Faculty of Medicine, University of Toronto, Toronto  
9 ON, Canada  
10 2. Center for Integrative Brain Research, Seattle Children's Research Institute, Seattle WA,  
11 USA  
12 3. Krembil Centre for Neuroinformatics, Centre for Addiction and Mental Health, Toronto ON,  
13 Canada  
14 4. Department of Psychiatry, University of Toronto, Toronto ON, Canada  
15 5. Institute of Medical Science, University of Toronto, Toronto ON, Canada  
16 6. Department of Obstetrics and Gynecology, University of Toronto, Toronto ON, Canada

17

18 Corresponding author:  
19 E.K. Lambe, Ph.D.  
20 1 King's College Circle  
21 Toronto ON  
22 Canada M5S 1A8  
23 (416) 946-0910  
24 Email: [evelyn.lambe@utoronto.ca](mailto:evelyn.lambe@utoronto.ca)

25

26  
27 Pages: 34

28 Figures: 9

29 Tables: 1

30 Supplementary materials: 5

31 Words: Abstract (150), Introduction (609), Discussion (1106)

32

33 **Conflicts of interest:** None

34

35 **Acknowledgements:** We acknowledge the generous support of the Canadian Institutes of Health  
36 Research (CIHR MOP 89825, EKL; CIHR PJT-153101, EKL), the Canada Research Chair in  
37 Developmental Cortical Physiology (EKL), an Ontario Graduate Scholarship (SV). We thank  
38 Ms. Janice McNabb and Mr. Ha-Seul Jeoung for expert technical assistance. Earlier  
39 presentations of this work received valuable feedback from Dr. Junchul Kim, Dr. Beverly Orser,  
40 and Dr. Steve Prescott of the University of Toronto.

41 **Abstract (150 words)**

42 Attention depends on cholinergic excitation of prefrontal neurons. Knockout/knockdown studies  
43 indicate nicotinic alpha5 subunits encoded by *Chrna5* are required for this response, but their  
44 native cellular roles and molecular interactions are unknown. Here, we probe endogenous  
45 cholinergic regulation of prefrontal *Chrna5*-expressing neurons (*Chrna5*<sup>+</sup>) using compound  
46 transgenic mice. *Chrna5*<sup>+</sup> neurons show high sensitivity to acetylcholine, with a subpopulation  
47 clearly different from nearby, well-examined *Syt6*<sup>+</sup> cells. Transcriptomic analysis reveals this  
48 distinct *Chrna5*<sup>+</sup> population as subplate neurons, a diverse group of firstborn cells that have eluded  
49 previous transgenic characterization. Intriguingly, *Chrna5*<sup>+</sup> subplate neurons express a distinct  
50 profile of GPI-anchored lynx prototoxins, suggesting specialized regulation of their cholinergic  
51 responses. In brain slices, endogenous nicotinic responses can be bidirectionally altered by  
52 perturbing GPI-anchored lynxes with phospholipase C activation or exogenous application of  
53 recombinant *Ly6g6e* prototoxin. Our work reveals cell-type specific *Chrna5* and *Lynx* modulation  
54 leading to exquisite cholinergic sensitivity of prefrontal subplate neurons in adulthood.

55

56 **Teaser**

57 *Chrna5*-expression identifies subplate neurons in the adult prefrontal cortex with enhanced  
58 cholinergic sensitivity.

## 59 **Introduction** (609 words)

60 Cholinergic modulation of the medial prefrontal cortex (mPFC) is essential for attention and  
61 detection of sensory cues (1–4). Deep-layer pyramidal neurons in the PFC are critically involved  
62 in such executive function (5–7) and are robustly excited by acetylcholine (8, 9), through nicotinic  
63 and muscarinic receptor activation (10). The  $\alpha 5$  nicotinic receptor subunit encoded by *Chrna5* is  
64 specifically expressed in deep-layer pyramidal neurons (11, 12), forming high-affinity nicotinic  
65 receptors in combination with  $\alpha 4$  and  $\beta 2$  subunits. Electrophysiological, behavioural, and genetic  
66 evidence in both rodents and humans point to an important role of *Chrna5* expression for nicotinic  
67 receptor function, attention, and executive function.

68 Constitutive knock out of *Chrna5* in mice or knockdown in the adult rat PFC disrupts  
69 attention and reduce nicotinic receptor activation by exogenous acetylcholine stimulation in layer  
70 6 neurons (13–15). Optogenetic experiments in *Chrna5*<sup>-/-</sup> mice show that *Chrna5* is required for  
71 rapid onset of postsynaptic cholinergic activation and prevents desensitization of the endogenous  
72 cholinergic response during prolonged stimulation (16). In humans, the non-synonymous  
73 rs16969968 (D398N) polymorphism in *Chrna5* is associated with nicotine dependence,  
74 schizophrenia and cognitive impairment (17–19). Nicotinic  $\alpha 4\beta 2\alpha 5$  receptors with the D398N  
75 polymorphism have partial loss of function, attributed to changes in receptor desensitization,  
76 calcium permeability, or membrane trafficking (20–22).

77 Despite the clear indications of alpha5 nicotinic receptor involvement in attention and  
78 prefrontal cholinergic activation, systematic characterization of *Chrna5*-expressing neurons using  
79 modern genetic tools is lacking. Deep-layer neurons include diverse corticothalamic (L6CT),  
80 corticocortical, and layer 6b (L6b) populations (23–25). *Chrna5* is predicted to be expressed in  
81 L6CT neurons (8, 26), which are usually identified by their expression of *Syt6*, a conserved L6CT  
82 neuronal marker (27–29). *Syt6*-Cre mice have been widely used to characterize prefrontal L6CT  
83 neurons and their cholinergic properties (30–32). However, it is unclear whether these are the same  
84 neurons expressing *Chrna5*. Characterization of *Chrna5*-expressing neurons has been limited by  
85 the lack of verified antibodies for the  $\alpha 5$  subunit that could be used for post-hoc immunostaining.  
86 Previous BAC-transgenic mice labeling *Chrna5*-expressing neurons had altered expression of  
87 other genes in the tightly linked *Chrna5/a3/b4* gene cluster, limiting their use for functional  
88 examination (33). This issue was circumvented by disrupting the open reading frames of  
89 *Chrna3/b4* in the BAC transgene to generate a *Chrna5*-Cre mouse without misexpression artifacts  
90 (34).

91 Using compound transgenic mice, we first interrogated the response to optogenetic  
92 cholinergic stimulation and found stronger and faster responses in prefrontal *Chrna5*-expressing  
93 (*Chrna5*<sup>+</sup>) versus nonlabelled neurons. This prompted multi-approach characterization of *Chrna5*<sup>+</sup>  
94 neurons versus better-defined *Syt6*-expressing (*Syt6*<sup>+</sup>) neurons. A large subset of *Chrna5*<sup>+</sup> neurons  
95 were dissimilar to *Syt6*<sup>+</sup> neurons, demonstrating higher affinity acetylcholine responses. Single-  
96 cell RNAseq analysis revealed the expression of several subplate markers (*Cplx3*, *Ctgf*, and *Lpar1*)  
97 in this *Chrna5*<sup>+</sup> subset, identifying them as subplate neurons born early in development that are  
98 critical for establishing thalamocortical connectivity (35–37). *Chrna5*<sup>+</sup> subplate neurons had a  
99 distinct expression pattern of GPI-anchored Lynx prototoxins with significantly enhanced

100 expression of *Ly6g6e*, *Lypd1*, and *Lypd6b*, together capable of exerting complex modulation of  
101 nicotinic receptor properties (38, 39). Consistently, removing GPI-anchored lynxes by PLC  
102 activation altered optogenetic nicotinic response onset and amplitude. Exogenous application of  
103 Ly6g6e prototoxin suppressed Syt6<sup>+</sup> but not Chrna5<sup>+</sup> nicotinic responses, revealing complex cell-  
104 type specific Lynx-mediated regulation of nicotinic receptors.

105 Recent studies have focused on cell-type specific modulation of nicotinic receptors by  
106 different Lynx prototoxins and the consequences for cortical development and cognition (40–43).  
107 Here, we discovered endogenous Lynx modulation of nicotinic properties relevant for attention in  
108 subplate neurons expressing *Chrna5*. These findings provide the first characterization of Chrna5<sup>+</sup>  
109 neurons and the molecular determinants underlying their cholinergic properties, while identifying  
110 *Chrna5* as a marker for subplate neurons with greater cholinergic responses.

## 111 **Methods**

### 112 ***Animals***

113 *Syt6-Cre<sup>+</sup>GCaMP6s<sup>+</sup>* and *Chrna5-Cre<sup>+</sup>GCaMP6s<sup>+</sup>* mice used for calcium imaging were obtained  
114 by crossing *Chrna5-Cre* (Gift from Dr. Eric Turner) and *Syt6-Cre* mice (*Syt6-Cre* KI148,  
115 RRID:MMRRC 037416-UCD, (44)) respectively, with Ai96 mice (JAX: 024106). For  
116 electrophysiological recordings of labeled Chrna5<sup>+</sup> and Syt6<sup>+</sup> neurons, we used *Chrna5-*  
117 *Cre<sup>+</sup>Ai14<sup>+</sup>*, and *Syt6-Cre<sup>+</sup>Ai14<sup>+</sup>* mice respectively. *Syt6-EGFP<sup>+</sup>* mice were additionally used for  
118 few experiments (*Syt6-EGFP* EL71, RRID:MMRRC 010557-UCD, (45)).

119 Triple transgenic mice labeling both *Chrna5* and *Syt6*-expressing neurons with EGFP in  
120 Syt6<sup>+</sup> neurons and tdTomato in Chrna5<sup>+</sup> neurons were used to examine the overlap between the  
121 two cell types. *Syt6-EGFP* and Ai14 mice (46) were bred together and the offspring were crossed  
122 with *Chrna5-Cre* mice to generate *Chrna5-Cre<sup>+</sup>Ai14<sup>+</sup>Syt6-EGFP<sup>+</sup>* mice used for these  
123 experiments. A set of experiments measuring optogenetic cholinergic responses was also  
124 performed in ChAT-ChR2 (ChAT<sup>+</sup>) mice (JAX: 014546). To examine optogenetic cholinergic  
125 responses in labeled Chrna5 and Syt6 cell populations, the respective Cre lines were crossed with  
126 ChAT<sup>+</sup>Ai14<sup>+</sup> mice to generate *Chrna5-Cre<sup>+</sup>Ai14<sup>+</sup>ChAT<sup>+</sup>* and *Syt6-Cre<sup>+</sup>Ai14<sup>+</sup>ChAT<sup>+</sup>* mice.

127 All animals were bred on a C57BL/6 background, except *Syt6-EGFP* which were Black  
128 Swiss. Adult male and female animals age >P60 were used in the study. Mice were separated based  
129 on sex after weaning at P21 and group-housed (2–4 mice per cage). Animals had ad libitum access  
130 to food and water and were on a 12-h light/dark cycle with lights on at 7 AM. Guidelines of the  
131 Canadian Council on Animal Care were followed, and all experimental procedures were approved  
132 by the Faculty of Medicine Animal Care Committee at the University of Toronto. 42 mice were  
133 used for the entire study, with similar numbers of males and females.

### 134 ***Brain slicing and electrophysiology***

135 Slicing and electrophysiology followed procedures described previously (16). An intraperitoneal  
136 injection of chloral hydrate (400 mg/kg) was given to anesthetize mice prior to decapitation. The  
137 brain was rapidly extracted in ice cold sucrose ACSF (254 mM sucrose, 10 mM D-glucose, 26  
138 mM NaHCO<sub>3</sub>, 2 mM CaCl<sub>2</sub>, 2 mM MgSO<sub>4</sub>, 3 mM KCl and 1.25 mM NaH<sub>2</sub>PO<sub>4</sub>). 400 μm thick

139 coronal slices of prefrontal cortex (Bregma 2.2 - 1.1) were obtained on a Dosaka linear slicer  
140 (SciMedia, Costa Mesa, CA, USA). Slices were left to recover for at least 2 hours in oxygenated  
141 (95% O<sub>2</sub>, 5% CO<sub>2</sub>) ACSF (128 mM NaCl, 10 mM D-glucose, 26 Mm NaHCO<sub>3</sub>, 2 mM CaCl<sub>2</sub>, 2  
142 mM MgSO<sub>4</sub>, 3 Mm KCl, and 1.25 mM NaH<sub>2</sub>PO<sub>4</sub>) at 30°C before being used for electrophysiology  
143 or two-photon calcium imaging. Brain slices were transferred to the stage of a BX51WI  
144 microscope (Olympus, Tokyo, Japan) and perfused with oxygenated ACSF at 30°C. Recording  
145 electrodes (2 - 4 MΩ) containing patch solution (120 mM potassium gluconate, 5 mM KCl, 10  
146 mM HEPES, 2 mM MgCl<sub>2</sub>, 4 mM K<sub>2</sub>-ATP, 0.4 mM Na<sub>2</sub>-GTP and 10 mM sodium  
147 phosphocreatine, pH adjusted to 7.3 using KOH) were used to patch pyramidal neurons in layer 6  
148 - 6b based on morphology and proximity to white matter. Only regular spiking neurons were  
149 included. Multiclamp 700B amplifier at 20 kHz with Digidata 1440A and pClamp 10.7 software  
150 (Molecular devices) were used for data acquisition. All recordings were compensated for liquid  
151 junction potential (14 mV). Voltage-clamp responses were examined at -75 mV and in current-  
152 clamp at rest or starting from -70 mV.

### 153 ***Optogenetics***

154 5 ms pulses of blue light (473 nm) were delivered through the 60X objective lens with an LED  
155 (Thorlabs, 2 mW) to excite channelrhodopsin containing cholinergic fibers. Pattern of stimulation  
156 was as in a previous study, with 8 pulses of light delivered in a frequency accommodating manner  
157 (16).

### 158 ***Pharmacology***

159 Acetylcholine (1mM, Sigma) was used to exogenously stimulate cholinergic receptors. Atropine  
160 (200 nM, Sigma) and Dihydro-β-erythroidine (DHBE, 10 μM, Tocris) were used to competitively  
161 block muscarinic receptors and β<sub>2</sub> subunit-containing nicotinic receptors respectively.  
162 Mecamylamine (5 μM, Tocris) was used to further non-competitively block nicotinic receptors.  
163 Phospholipase C activator m-3M3FBS (25 μM, Tocris) was used to cleave GPI-anchored Lynx  
164 prototoxins and the inactive ortholog o-3M3FBS (25 μM, Tocris) was used as a control (47).  
165 Cyclodextrin (1 mM, Tocris) was included in a small subset of experiments to improve solubility  
166 of 3M3FBS compounds, but no further improvement in efficacy was observed. Water soluble  
167 recombinant Ly6g6e (0.5 mg/ml) was obtained by custom purification (Creative Biomart) and  
168 used for exogenous application at 1: 1000 and 3:1000 dilution. Effects on nicotinic receptors were  
169 not distinguishable between the two different protein concentrations. Only freshly thawed protein  
170 aliquots were used for experiments.

### 171 ***Two-photon imaging***

172 Two-photon imaging of GCaMP6s calcium signals in L6 neurons was performed using a 60×  
173 water-immersion objective with 0.90 numerical aperture using an Olympus Fluoview FV1000  
174 microscope and a Titanium-Sapphire laser sapphire laser (Newport) at 930nm. Images were  
175 sampled at 512 x 512 pixels (2.4 pixels/μm) at a frame rate of 0.9 Hz. Following a 2-minute  
176 washout period for this initial application, GCaMP6s calcium signals were measured in response  
177 to acetylcholine (1 mM, 15 s). The cellular responses to acetylcholine were measured at baseline,  
178 then after application of competitive nicotinic receptor antagonist DHBE (10 μM, 10 min), and  
179 again after the addition of muscarinic antagonist atropine (200 nM, 10 min).

180 Dual color two-photon imaging (910 nm excitation, using 570 nm dichroic mirror with  
181 green (540-595 nm) and red (570-620 nm) filters) was performed in brain slices of triple transgenic  
182 *Chrna5-Cre<sup>+</sup>Ai14<sup>+</sup>Syt6-EGFP<sup>+</sup>* mice to examine overlap in fluorescent reporter expression  
183 between *Chrna5<sup>+</sup>* and *Syt6<sup>+</sup>* neurons. Z-stacks of 30 frames acquired in 1- $\mu$ m steps were taken in  
184 layer 6 of mPFC slices and the maximum projection used to count cells with the cell counter feature  
185 in Fiji. A set of mPFC brain slices from *Chrna5-Cre<sup>+</sup>Ai14<sup>+</sup>Syt6-EGFP<sup>+</sup>* mice were also fixed and  
186 mounted for confocal imaging with LSM880 (Leica) microscope.

### 187 *Single cell RNAseq analysis*

188 Single cell RNAseq data for Anterior Cingulate Cortex (ACA) of adult mice was taken from the  
189 ACA and MOP Smart-Seq (2018) database, with cell-type annotations from Whole cortex &  
190 Hippocampus Smart-Seq (2019) database from the Allen Institute for Brain Science at  
191 <https://portal.brain-map.org/atlas-and-data/rnaseq> (48, 49). Single cell analysis was performed  
192 using the R package Seurat (v 4.04). Layer 5 and 6 glutamatergic neurons were selected and sorted  
193 into three cell classes based on their expression of *Chrna5* and *Syt6* genes: those expressing only  
194 *Chrna5* (*Chrna5<sup>+</sup>*, n = 243), only *Syt6* (*Syt6<sup>+</sup>*, n = 834), or both *Chrna5* and *Syt6* (*Chrna5<sup>+</sup>Syt6<sup>+</sup>*,  
195 n = 564). Expression (copies per million) greater than zero was used as the threshold. 781 cells did  
196 not express either *Chrna5* or *Syt6* and were not used in subsequent analyses. Rare cell types with  
197 fewer than 10 cells per group are not shown in the heatmap in figure 5 but are included for the  
198 differential expression analysis. The FindMarkers function in Seurat was used to identify genes  
199 differentially expressed between the *Chrna5<sup>+</sup>* and *Chrna5<sup>+</sup>Syt6<sup>+</sup>* populations. Adjusted p value <  
200 0.05 was used as the cutoff for identifying differentially expressed genes.

### 201 *Analysis and statistics*

202 Analysis of electrophysiological data was conducted on Clampfit 10.7 and Axograph. Rising slope  
203 was measured by fitting a line to the first 50ms of the optogenetic cholinergic responses.  
204 Cholinergic response magnitude in voltage clamp was determined by peak current (picoamperes)  
205 and charge transfer (picocoulombs) measured by the area under the current response for 1 second.

206 GCaMP6s imaging data were extracted using the multi-measure feature in Fiji. Maximum  
207 projections across time for each experiment were first used to identify acetylcholine-responsive  
208 cells and add them to the ROI manager, then fluorescence intensity at all timepoints for each cell  
209 was measured. Fluorescence was normalized to the background fluorescence averaged over the  
210 first 10 frames. Area under the peak (AUP) of the signal after baseline correction was used to  
211 quantify the magnitude of cells' response to acetylcholine. Percentage response remaining after  
212 DHBE and DHBE+Atropine was calculated from the cell AUP before and after the blockers.

213 GraphPad Prism 8 was used for statistical analysis and plotting graphs. Bar graphs  
214 depicting mean with standard error and boxplots with median and quartiles are shown. Effect sizes  
215 are reported as Cohen's d for major results (50). Unpaired t-tests or Mann-Whitney tests were used  
216 when comparing response properties between cell types, and paired t-test or Wilcoxon test to  
217 quantify effect of pharmacological manipulations within cells. Kolmogorov-Smirnov and Fisher's  
218 exact tests were used to compare cumulative distributions and proportions of cells respectively.



## 219 **Results**

### 220 ***Chrna5* expression identifies a distinct population of ‘acetylcholine super-responder’ neurons** 221 ***with stronger and faster-onset optogenetic cholinergic responses***

222 *Chrna5* is expressed in deep-layer pyramidal neurons in the prefrontal cortex and thought to  
223 modulate their nicotinic receptor properties to improve attentional processing. However,  
224 characterization of prefrontal *Chrna5*-expressing (*Chrna5*<sup>+</sup>) neurons has not been undertaken  
225 previously due to a lack of viable labeling strategies. Using recently available *Chrna5*-Cre mice  
226 (34), we generated triple transgenic *Chrna5*-Cre<sup>+</sup>Ai14<sup>+</sup>ChAT-ChR2<sup>+</sup> mice (**Fig 1A**) to interrogate  
227 optogenetic cholinergic responses in labeled *Chrna5*<sup>+</sup> neurons. These mice expressed tdTomato in  
228 *Chrna5*<sup>+</sup> neurons and channelrhodopsin 2 in cholinergic axons as seen by two-photon imaging  
229 (**Fig 1B**). We recorded endogenous responses to optogenetic cholinergic stimulation by patch-  
230 clamp electrophysiology in mPFC slices and compared the properties of labeled *Chrna5*<sup>+</sup> and  
231 unlabeled *Chrna5*<sup>-</sup> pyramidal neurons in layer 6 (**Fig 1C**). Neurons identified by their *Chrna5*  
232 expression showed larger-amplitude cholinergic responses with significantly faster onset  
233 compared to other unlabeled deep-layer pyramidal neurons (**Fig 1D-F**). The rising slope was  
234 significantly larger in *Chrna5*<sup>+</sup> neurons (220 ± 32 pA/s, 24 cells from 4 mice) compared to  
235 unlabeled neurons (123 ± 22 pA/s, 15 cells;  $t_{(37)} = 2.19$ ,  $P = 0.02$ ; Cohen’s d: 0.72). Similarly, peak  
236 current evoked by optogenetic acetylcholine release was greater in *Chrna5*<sup>+</sup> neurons (15 ± 2 pA)  
237 compared to unlabeled neurons (8 ± 1 pA,  $t_{(37)} = 2.52$ ,  $P = 0.02$ ; Cohen’s d: 0.83), as well as the  
238 area of the cholinergic response ( $t_{(37)} = 2.06$ ,  $P = 0.046$ ). Intrinsic electrophysiological properties  
239 including resting membrane potential, input resistance, capacitance, spike threshold, amplitude  
240 and rheobase did not differ between *Chrna5*<sup>+</sup> and unlabeled neurons (**Supplementary table 1**).  
241 As reported previously in a broader layer 6 population (16), cholinergic responses in *Chrna5*<sup>+</sup>  
242 neurons were under presynaptic muscarinic autoinhibitory control, which was relieved by atropine  
243 resulting in even larger responses (94 ± 42% increase). The addition of nicotinic antagonist DHBE  
244 eliminated optogenetic cholinergic responses (99 ± 3 % reduction), indicating the predominant  
245 contribution of β2 subunit-containing nicotinic receptors in *Chrna5*<sup>+</sup> neurons. Our initial  
246 characterization of *Chrna5*<sup>+</sup> neurons revealed them to be acetylcholine ‘super-responders’ with  
247 stronger and faster onset cholinergic responses distinct from other deep-layer pyramidal  
248 neurons. This prompted us to question how these cells differ from other well-defined layer 6  
249 neurons labeled by *Syt6* expression (*Syt6*<sup>+</sup>).

250 *Syt6* has been extensively used as a marker to characterize layer 6 corticothalamic neurons  
251 and their function during PFC-dependent tasks (28, 30, 31, 51). Yet, the extent of overlap between  
252 *Chrna5* and *Syt6* expressing deep-layer pyramidal neuron populations is unclear. Therefore, we  
253 adopted an imaging strategy to visualize the distribution of *Chrna5*<sup>+</sup> and *Syt6*<sup>+</sup> neurons in the PFC  
254 and determine the exact proportion of distinctive non-overlapping *Chrna5*<sup>+</sup> neurons. We generated  
255 a compound transgenic *Chrna5*-Cre<sup>+</sup>Ai14<sup>+</sup>*Syt6*-EGFP<sup>+</sup> mouse to simultaneously express  
256 tdTomato in *Chrna5*<sup>+</sup> neurons and EGFP in *Syt6*<sup>+</sup> neurons and performed confocal and two photon  
257 imaging of the endogenous fluorescence of these reporters in mPFC brain slices. *Chrna5*<sup>+</sup> and  
258 *Syt6*<sup>+</sup> neurons were both present primarily in layer 6, with a few *Chrna5*<sup>+</sup> neurons in layer 5 (**Fig**  
259 **1G, I**). Closer investigation confirmed the existence of a substantial proportion of exclusively

260 Chrna5+ neurons (37% of all labeled cells) which do not express *Syt6*, in addition to overlapping  
261 Chrna5+Syt6+ neurons (39%) which express both markers, and exclusively Syt6+ neurons (24%)  
262 which do not express *Chrna5* (N = 4 mice, **Fig 1H, J**). Thus, nearly half of all *Chrna5*-expressing  
263 neurons are not labeled by *Syt6*-expression and would be excluded in previous studies using *Syt6*-  
264 Cre mice.

265 ***Calcium imaging in Chrna5+ and Syt6+ layer 6 populations reveal a distinct subset of Chrna5+***  
266 ***neurons with highly resilient nicotinic receptor-mediated responses.***

267 We next examined population level cholinergic responses in Chrna5+ and Syt6+ neurons to  
268 identify properties that distinguish the distinct subset of Chrna5+ neurons not found with Syt6-  
269 labeling approaches. We measured acetylcholine-evoked signals in multiple neurons  
270 simultaneously using *ex vivo* GCaMP6s calcium imaging in brain slices. We generated transgenic  
271 mice expressing GCaMP6s in either Chrna5+ (*Chrna5*-Cre Ai96) or Syt6+ (*Syt6*-Cre Ai96)  
272 neurons and performed two-photon imaging of mPFC layer 6 (**Fig 2A**). Calcium signals evoked  
273 by acetylcholine (1 mM, 15 s) were measured in Chrna5+ (supplementary video 1) and Syt6+  
274 neurons (supplementary video 2). Changes in the calcium signal and proportions of acetylcholine-  
275 responsive neurons were measured after the application of competitive nicotinic receptor  
276 antagonist DHBE and addition of muscarinic antagonist atropine (**Fig 2A, B**). The proportion of  
277 acetylcholine-evoked calcium signals remaining after the application of the competitive nicotinic  
278 antagonist DHBE (10  $\mu$ M, 10 min) was significantly greater in Chrna5+ neurons ( $35 \pm 3$  % of  
279 baseline, n = 71 cells, 6 mice; Fig 2C i), compared to Syt6+ neurons ( $21 \pm 3$ % of baseline, n = 112  
280 cells, 7 mice; Mann Whitney U = 2400,  $P < 10^{-4}$ ). The cumulative distribution of responses  
281 remaining after DHBE was significantly right shifted in Chrna5+ neurons compared to Syt6+  
282 neurons (Fig 2C ii, Kolmogorov Smirnov D = 0.37,  $P < 10^{-4}$ ). A majority of Chrna5+ neurons  
283 (~83%) still showed acetylcholine-evoked responses after DHBE, whereas only fewer Syt6+  
284 neurons (~50%) retained their responses, with a complete elimination of acetylcholine-evoked  
285 responses in the rest (Fig 2C iii, Fisher's exact test:  $P < 10^{-4}$ ). Yet, the addition of muscarinic  
286 antagonist atropine did not attenuate the striking differences between Chrna5+ and Syt6+ neurons,  
287 raising the possibility of an underlying nicotinic mechanism (**Fig 2D**). In the presence of DHBE+  
288 atropine, a subset of Chrna5+ neurons still showed substantial acetylcholine-evoked calcium  
289 signals ( $6 \pm 1$  % of baseline; Fig 2Di), whereas almost all Syt6+ neurons' responses were  
290 completely blocked ( $0.2 \pm 0.1$  % of baseline; Mann Whitney U = 2083,  $P < 10^{-4}$ ) as seen from the  
291 cumulative distribution (Fig 2D ii, Kolmogorov Smirnov D = 0.36,  $P < 10^{-4}$ ). The proportion of  
292 Chrna5+ and Syt6+ neurons showing acetylcholine-evoked responses after DHBE+ Atropine was  
293 significantly different (41% vs 6%, Fisher's exact test:  $P < 10^{-4}$ , **Fig 2D iii**).

294 While optogenetic cholinergic responses in Chrna5+ neurons were eliminated by the combination  
295 of DHBE and atropine, residual responses to strong stimulation with exogenous acetylcholine were  
296 observed in a large Chrna5+ subset following DHBE and atropine. Since DHBE is a competitive  
297 antagonist, it can be outcompeted by exogenous acetylcholine at high affinity nicotinic receptors.  
298 We hypothesized that the resilience of exogenous acetylcholine-evoked responses to competitive  
299 nicotinic receptor block in a large subset of Chrna5+ neurons indicated high affinity nicotinic  
300 receptors which would require non-competitive blockers to be completely blocked. We switched



301 to patch-clamp electrophysiology to test this hypothesis and investigate acetylcholine-evoked  
302 spiking in individual *Chrna5*<sup>+</sup> and *Syt6*<sup>+</sup> neurons. We recorded current clamp responses to  
303 acetylcholine (1 mM, 15 s) in labeled *Chrna5*<sup>+</sup> and *Syt6*<sup>+</sup> neurons from *Chrna5-Cre*<sup>+/+</sup>*Ai14*<sup>+/+</sup> and  
304 *Syt6-Cre*<sup>+/+</sup>*Ai14*<sup>+/+</sup> or *Syt6-EGFP* mice respectively (**Fig 2E**). *Chrna5*<sup>+</sup> neurons showed stronger  
305 acetylcholine-evoked firing: attaining significantly higher peak firing frequency ( $29 \pm 6$  Hz,  $n=12$   
306 cells, 6 mice;  $t_{(24)} = 2.74$ ,  $P = 0.01$ ; Cohen's  $d$ : 1.08) compared to *Syt6*<sup>+</sup> neurons ( $13 \pm 2$  Hz,  $n =$   
307 14 cells, 5 mice; Fig 3B). The intrinsic electrophysiological properties of *Chrna5*<sup>+</sup> and *Syt6*<sup>+</sup>  
308 neurons did not show statistically significant differences (**Supplementary table 2**). We next  
309 examined the sensitivity of acetylcholine-evoked firing to competitive nicotinic receptor block by  
310 DHBE in the presence of atropine. Acetylcholine-evoked firing was completely eliminated in all  
311 *Syt6*<sup>+</sup> neurons (**Fig 2F**) whereas a large subset of *Chrna5*<sup>+</sup> neurons (7/11) retained their ability to  
312 respond to acetylcholine (Average peak firing rate:  $6 \pm 2$  Hz;  $t_{(19)} = 3.22$ ,  $P = 0.004$ , unpaired t-  
313 test) demonstrating similar resilience to competitive nicotinic receptor block as observed with  
314 calcium imaging. We used the non-competitive nicotinic receptor blocker mecamylamine (54, 55)  
315 to test our hypothesis that nicotinic receptors in this *Chrna5*<sup>+</sup> subset were higher affinity and  
316 therefore allowed exogenous acetylcholine to outcompete DHBE. The addition of 5  $\mu$ M  
317 mecamylamine was sufficient to eliminate acetylcholine-evoked firing in all the *Chrna5*<sup>+</sup> neurons  
318 that were resilient to competitive nicotinic block ( $t_{(4)} = 5.14$ ,  $P = 0.007$ , paired t-test; Fig 2F).  
319 Together, our calcium imaging and electrophysiology experiments neurons revealed the existence  
320 of a distinct subset of *Chrna5*<sup>+</sup> neurons that were dissimilar to *Syt6*<sup>+</sup> neurons, with high affinity  
321 nicotinic responses that were resilient to competitive nicotinic antagonism. To answer why  
322 enhanced cholinergic responses are found only in the *Chrna5*<sup>+</sup> subset that is distinct from *Syt6*<sup>+</sup>  
323 neurons, we turned to single-cell RNAseq to understand the diversity of *Chrna5*<sup>+</sup> neurons and the  
324 molecular determinants of their cholinergic properties.

### 325 ***Single-cell transcriptomics identifies Chrna5+ subplate neurons with distinct expression pattern*** 326 ***of Lynx genes modulating cholinergic function***

327 We sought to identify whether the exclusive *Chrna5*<sup>+</sup> neurons arise from a different set of cell  
328 populations than *Syt6*<sup>+</sup> neurons. Therefore, we extracted gene expression data of L5-6  
329 glutamatergic neurons ( $n = 2422$  cells) in the mouse anterior cingulate cortex from the Allen  
330 Institute single cell RNAseq databases (48, 49, 56). We classified these deep-layer pyramidal  
331 neurons into 3 groups as seen with imaging: those expressing only *Chrna5* (*Chrna5*<sup>+</sup>,  $n= 243$ ),  
332 both *Chrna5* and *Syt6* (*Chrna5*<sup>+</sup> *Syt6*<sup>+</sup>,  $n = 834$ ), or only *Syt6* (*Syt6*<sup>+</sup>,  $n = 564$ ) (**Fig 3A**). 781 cells  
333 showed no expression of *Chrna5* or *Syt6* and consisted primarily of L6 Intratelencephalic cells  
334 which have been previously shown to have purely muscarinic M2/M4 mediated hyperpolarizing  
335 cholinergic responses (16, 57). We focused on the *Chrna5*<sup>+</sup>, *Syt6*<sup>+</sup> and *Chrna5*<sup>+</sup>*Syt6*<sup>+</sup> groups to  
336 examine their transcriptomic differences. Single-cell analysis revealed that the *Chrna5*<sup>+</sup> group  
337 primarily included L6b (44%), L5 near-projecting (L5NP, 19%), and L6CT neurons (30%),  
338 whereas the *Chrna5*<sup>+</sup>*Syt6*<sup>+</sup> and *Syt6*<sup>+</sup> groups were predominantly composed of L6CT neurons  
339 (>90%) (**Fig 3B**). We examined the expression of marker genes in these respective groups to  
340 validate our cell-classification. To our surprise, *Chrna5*<sup>+</sup> neurons showed distinctive expression  
341 of several marker genes- *Ctgf*, *Cplx3*, *Kcnab1*, *Lpar1* (**Fig 3B,C**) associated with subplate neurons  
342 (35, 58). Subplate neurons are vital for early brain development and L6b neurons are considered

343 descendants of this early-born population (36, 37, 59). Notably, the highest fold enrichment among  
344 all differentially expressed genes in Chrna5+ neurons was found for subplate markers *Ctgf* (Fold  
345 change, 5.69) and *Cplx3* (3.81) (**Table 1**). Overall, Chrna5+ neurons including both L5NP and  
346 L6b subpopulations highly express subplate marker genes. In contrast, *Syt6*-expressing  
347 Chrna5+Syt6+ and Syt6+ groups are only enriched in the corticothalamic markers *Foxp2* and *Syt6*,  
348 consistent with their corticothalamic subtype. These results support our imaging,  
349 electrophysiological, and pharmacological results suggesting the exclusive Chrna5+ population is  
350 distinct from typical L6CT *Syt6*-expressing neurons.

351 Next, we examined differential expression of genes with known effects on postsynaptic  
352 cholinergic responses to identify molecular changes predictive of Chrna5+ ‘super-responders’ with  
353 high-affinity nicotinic responses (**Fig 3D-E**). We selected cholinergic receptor genes (nicotinic  
354 *Chrna5-2*, *Chrna7*, *Chrn2-4*, and muscarinic subunits *Chrm1-4*), acetylcholinesterase (*Ache*),  
355 and members of the family of genes that encode lynx proteins (*Ly6e*, *Ly6h*, *Ly6g6e*, *Lynx1*, *Lypd1*,  
356 *Lypd6*, *Lypd6b*) known to allosterically modulate nicotinic receptor responses (38). We found  
357 substantial and highly significant changes primarily in the expression of three lynx prototoxins  
358 *Lypd1*, *Ly6g6e* and *Lypd6b* (**Fig 3D**). While both Chrna5+ and Chrna5+Syt6+ populations express  
359 *Chrna5*, there was slightly higher expression of *Chrna5* (25% increase) as well as lower expression  
360 of the inhibitory muscarinic receptor *Chrm2* (20% decrease) in Chrna5+Syt6+ neurons. There  
361 were no significant differences in other nicotinic and muscarinic subunit expression between the  
362 two groups. Acetylcholinesterase, the enzyme that breaks down acetylcholine was highly  
363 expressed (50% increase) in Chrna5+ neurons, which may benefit their nicotinic responses by  
364 protecting receptors from overactivation and desensitization. The fold-change of the genes in  
365 figure 3E between Chrna5+ and Chrna5+Syt6+ neurons is shown in **Supplementary table 3**.

366 Notably, the top three genes with highest fold change in Chrna5+ neurons were the GPI-  
367 anchored lynx prototoxins: *Lynx2* encoded by *Lypd1* (Fold change: 2.55), *Ly6g6e* (2.03), and  
368 *Lypd6b* (1.51). *Ly6g6e* is thought to potentiate nicotinic receptors and slows nicotinic receptor  
369 desensitization (39) which might contribute to high-affinity nicotinic responses in Chrna5+  
370 neurons. *Lypd6b* has unknown effects (60) while *Lynx2* is thought to inhibit  $\alpha 4\beta 2$  nicotinic  
371 receptors (61). *Lynx2* may also intracellularly suppress expression of lower affinity  $\alpha 4\beta 2$  receptors  
372 (39) indirectly promoting the preferential expression of  $\alpha 5$  containing high affinity nicotinic  
373 receptors in Chrna5+ neurons. However, other lynxes such as *Lynx1* which negatively modulates  
374  $\alpha 4\beta 2$  receptors (41) were expressed at similar levels in the majority of cells across all three groups.  
375 The distinct pattern of expression of specific lynxes in Chrna5+ neurons suggests unexpectedly  
376 complex endogenous control of nicotinic responses in these prefrontal subplate neurons.

### 377 ***Cell type specific modulation of optogenetic nicotinic responses by endogenous GPI-anchored*** 378 ***lynxes***

379 Our transcriptomic analyses suggest that cells capable of fast and strong responses to optogenetic  
380 release of endogenous acetylcholine contain complex molecular machinery to regulate these  
381 responses. It is possible that this regulation endows deep layer prefrontal neurons with greater  
382 dynamic range in responding to acetylcholine. To examine whether this transcriptomic prediction  
383 is accurate, we sought to experimentally perturb endogenous lynx modulation. Members of the

lynx-family are GPI-anchored (**Fig 4A**), and work in cell expression systems (39) suggests these anchors can be cleaved via activation of phospholipase C (PLC). The potential impact of such GPI cleavage on nicotinic responses in a native system is not well understood. Perturbing lynx-mediated control could affect endogenous nicotinic properties in a complex manner (**Fig 4A**) since both positive (eg. Ly6g6e) and negative modulatory lynxes (eg. Lynx1) are expressed. To cleave GPI-anchored proteins, we used the PLC activator compound m-3M3FBS (47, 62–64). Nicotinic responses of deep layer pyramidal neurons from ChAT-ChR2 mice to optogenetic acetylcholine release were recorded in the continuous presence of atropine before and after treatment with m-3M3FBS (25 $\mu$ M, 5 min; **Fig 4B**). The rising slope of the nicotinic responses showed a significant increase after m-3M3FBS treatment ( $23 \pm 17\%$ ; Paired Cohen's  $d = 0.83$ ;  $P = 0.008$ , Wilcoxon matched-pairs test), compared to the baseline change observed in the same cells prior to PLC activation ( $-6 \pm 4\%$ ; 8 cells, 6 mice; **Fig 4C**). This increase was not observed with the inactive ortholog o-3M3FBS that does not activate PLC (Paired Cohen's  $d = 0.09$ ,  $P = 0.625$ , Wilcoxon matched-pairs test, data not shown). The area under the nicotinic response known as charge transfer also showed a statistically significant increase following PLC activation ( $22 \pm 7\%$ ; Cohen's  $d = 1.68$ ;  $P = 0.016$ , Wilcoxon matched-pairs test; **Fig 4D**), compared to baseline change ( $-9 \pm 6\%$ ). Thus, PLC activation causes a specific increase in nicotinic receptor responses, presumably due to cleavage of inhibitory GPI-anchored lynxes such as Lynx1. This result confirmed endogenous lynx modulation of optogenetic cholinergic responses in intact brain slices and validated our transcriptomic prediction of strong endogenous lynx regulation of nicotinic receptors in deep layer neurons.

Our transcriptomics results (Fig 3D) predicted that cell-type specific differences in Lynx modulation with enhanced expression of *Lypd1*, *Ly6g6e* and *Lypd6b* prototoxins in *Chrna5*<sup>+</sup> neurons lead to the different cholinergic properties of *Chrna5* versus *Syt6*-expressing neurons. To validate this prediction experimentally, we tested whether exogenous application of a specific lynx prototoxin exerts differential effects in *Chrna5* and *Syt6*-expressing neurons. Prior work suggests the direction of these effects may be difficult to predict, however, since soluble and endogenous GPI-anchored prototoxins have different effects on nicotinic receptors (41). Since previous work predicts a substantial modulatory role for endogenous Ly6g6e, we obtained purified water-soluble recombinant Ly6g6e protein and examined its effects on optogenetic nicotinic responses in labeled *Chrna5*<sup>+</sup> and *Syt6*<sup>+</sup> neurons (**Fig 4F**). These experiments were conducted in *Chrna5*-*Cre*<sup>+</sup>*Ai14*<sup>+</sup>*ChAT-ChR2*<sup>+</sup> and *Syt6*-*Cre*<sup>+</sup>*Ai14*<sup>+</sup>*ChAT-ChR2*<sup>+</sup> mice. We hypothesized that the modulation of *Chrna5*<sup>+</sup> neuronal nicotinic receptors by endogenous Ly6g6e would occlude the effect of exogenous soluble Ly6g6e, whereas *Syt6*<sup>+</sup> neurons would be altered by exposure to the exogenous Ly6g6e (Fig 4G). Consistently, we found that 10 minute application of soluble Ly6g6e did not significantly alter the amplitude of optogenetically evoked nicotinic responses in labeled *Chrna5*<sup>+</sup> neurons (Change in peak =  $-2.1 \pm 1.2$  pA,  $t_{(6)} = 1.79$ ,  $P = 0.12$ , paired t-test). However, in labeled *Syt6*<sup>+</sup> neurons lacking endogenous expression of *Ly6g6e*, exogenous application of soluble Ly6g6e caused a significant decrease in the amplitude (Change in peak =  $-10 \pm 1.8$  pA,  $t_{(8)} = 5.60$ ,  $P < 0.001$ , paired t-test; **Fig 4H**). The change in peak and area of the nicotinic responses caused by soluble Ly6g6e was significantly different between *Chrna5*<sup>+</sup> and *Syt6*<sup>+</sup> neurons (change in peak :  $t_{(14)} = 3.43$ ,  $P = 0.004$ ; Change in area:  $t_{(14)} = 2.53$ ,  $P = 0.024$ , Unpaired t test; **Fig 4I - J**).

Our work examines the effects of GPI-anchored lynx prototoxins on native nicotinic receptor-mediated optogenetic responses, advancing from work in heterologous expression systems. These results are a first step in showing how endogenous lynx regulation of nicotinic

430 responses can act in a complex cell-type specific fashion leading to specialized cholinergic  
431 properties in a subset of neurons. Overall, our study reveals a previously uncharacterized  
432 population of *Chrna5*-expressing subplate neurons in the prefrontal cortex that are exquisitely  
433 sensitive to acetylcholine, with differential expression of several lynx prototoxin genes that allow  
434 flexible tuning of their high-affinity nicotinic responses (**Fig 5**).

## 435 **Discussion (1106 words)**

436 With optophysiological approaches in *Chrna5*-Cre transgenic mice, we identified a subpopulation  
437 of prefrontal *Chrna5*-expressing neurons with faster and stronger cholinergic activation and high-  
438 affinity nicotinic responses. Transcriptomic analysis revealed these *Chrna5*<sup>+</sup> cholinergic ‘super-  
439 responders’ to express markers associated with subplate neurons, a developmentally-defined  
440 population associated with cortical layer 6b in adult rodents. These neurons show specific  
441 expression pattern of several GPI-anchored lynx prototoxins known to modulate nicotinic receptor  
442 function. Finally, by experimentally perturbing endogenous GPI-anchored lynx and exogenous  
443 application of a cell-type specific lynx, we revealed complex lynx-mediated control of endogenous  
444 nicotinic receptor function in prefrontal deep-layer neurons.

### 445 ***Specialized cholinergic properties of Chrna5-expressing neurons***

446 The functional impact of the auxiliary alpha5 nicotinic subunit in its native neuronal environment  
447 is unclear. Previous work extrapolated the neurophysiological contributions of alpha5 to high-  
448 affinity nicotinic receptors based on results of cell system experiments and work in rodents deleted  
449 for *Chrna5* (13, 16, 22, 65, 66). Here, *Chrna5*-Cre mice allowed us to affirmatively demonstrate  
450 that neurons expressing the alpha5 nicotinic subunit respond faster and more strongly to  
451 endogenous acetylcholine. This cholinergic heterogeneity among layer 6 neurons prompted a  
452 larger scale comparison between *Chrna5*<sup>+</sup> neurons and a well-defined layer 6 population labeled  
453 by *Syt6* (29). These experiments revealed a subset of *Chrna5*<sup>+</sup> cholinergic ‘super-responders’ with  
454 high affinity nicotinic responses that were not found in *Syt6*<sup>+</sup> neurons.

### 455 ***Heterogeneity of cell types expressing Chrna5***

456 Previously, the deep-layer cell types expressing *Chrna5* were uncharacterized, and generally  
457 thought to include L6CT neurons (8). Investigation of L6CT neurons have relied on *Syt6*-Cre and  
458 *Ntsr1*-Cre mouse lines that label similar sets of neurons (27–29), with only *Syt6*-Cre mice  
459 successfully labeling this population in prefrontal cortex (31). L6CT neurons act to control  
460 attention through their thalamic projections (67, 68), as well as their intracortical excitatory and  
461 inhibitory outputs (69–71). L6CT neurons labeled by *Syt6* or *Ntsr1* expression are excited by  
462 acetylcholine (32, 72), but it was unclear what proportion of these cells were modulated by the  $\alpha 5$   
463 nicotinic subunit and the degree to which their nicotinic response relied on *Chrna5* expression.  
464 Strikingly, our experiments reveal that the cholinergic super-responders with high affinity  
465 nicotinic receptors appear to be from the population of *Chrna5*-labeled neurons that lack *Syt6*-  
466 labeling. Our transcriptomic analysis demonstrates that majority of this likely population of  
467 *Chrna5*<sup>+</sup> ‘super-responders’ arise from L5 Near-Projecting and L6b neurons, populations that  
468 express multiple markers that link them to the developmental subplate. These enigmatic cells are  
469 remnants of the earliest-born cortical neurons that serve as a relay for establishing connections  
470 between cortex and thalamus (73, 74). Cholinergic innervation begins early in development and



471 subplate neurons already receive cholinergic inputs at birth (75), highlighting their role in  
472 developmental cholinergic modulation.

473

#### 474 ***Chrna5- a marker for subplate cells***

475 In contrast to L6CT neurons, subplate neurons are relatively uncharacterized due to the lack of  
476 transgenic mice that definitively label all subtypes as well as the inaccessibility of the available  
477 lines for *in vivo* targeting. We found *Chrna5*<sup>+</sup> cholinergic super-responders predominantly arise  
478 from neurons that are not labeled by *Syt6*. Transcriptomic analysis (Fig 5, Table 1) suggests that  
479 this *Chrna5*<sup>+</sup> population is enriched for known subplate markers *Ctgf* (Connective tissue growth  
480 factor), *Cplx3* (Complexin 3), *Kcnab1*, and *Lpar1* (35, 76, 77). Significantly, the lynx prototoxin  
481 and nicotinic receptor modulator *Ly6g6e*, which is highly expressed in *Chrna5*<sup>+</sup> neurons, is also a  
482 marker of subplate neurons (78). Our study is the first to identify enhanced cholinergic activation  
483 regulated by *Chrna5* and lynx-gene expression in subplate/L6b neurons. Subplate neurons have  
484 recently been found to strongly regulate cortical output through their intracortical connections (79,  
485 80). Enhanced cholinergic activation in these neurons will have different consequences for  
486 prefrontal processing, challenging the popular conception that cholinergic modulation of attention  
487 occurs only through top-down control of thalamic input by L6CT neurons.

#### 488 ***Molecular determinants of nicotinic receptor properties in Chrna5+ neurons***

489 Our transcriptomic analysis revealed enhanced expression of GPI-anchored lynx prototoxin genes  
490 *Ly6g6e*, *Lypd1*, and *Lypd6b* in *Chrna5*<sup>+</sup> neurons (Fig 5). Lynx proteins are well known modulators  
491 of nicotinic receptor properties and trafficking (41, 43), but most of the insight into their actions  
492 comes from heterologous cell systems, deletion, and overexpression experiments. Relatively little  
493 is known about their effects on nicotinic receptors in their native environment. In expression  
494 systems, *Ly6g6e* potentiates  $\alpha 4\beta 2$  nicotinic responses and slows their desensitization (39),  
495 predicting cholinergic responses in *Chrna5*<sup>+</sup> neurons would be resistant to desensitization, as has  
496 been implied by *Chrna5* deletion work (16). On the other hand, *Lynx2* is a negative nicotinic  
497 modulator that increases desensitization of  $\alpha 4\beta 2$  nicotinic receptors (61), and is selectively  
498 expressed in the medial PFC (81). While *Lynx2* is thought to act intracellularly to reduce surface  
499 expression of  $\alpha 4\beta 2$  nicotinic receptors (39), it may act selectively on the  $(\alpha 4)_3(\beta 2)_2$  receptor  
500 subtype which are lower affinity (65, 82) and indirectly promote expression of high affinity  $\alpha 5$ -  
501 containing  $(\alpha 4)_2(\beta 2)_2\alpha 5$  nicotinic receptors. The effect of *Lypd6b* on  $(\alpha 4)_2(\beta 2)_2\alpha 5$  nicotinic  
502 receptors found in *Chrna5*<sup>+</sup> neurons is yet to be determined and may further contribute to the  
503 complex control of their nicotinic responses (60). In addition, *Lynx1*, a well known negative  
504 modulator of  $\alpha 4\beta 2$  nicotinic receptors (42, 83–85) is also expressed uniformly across all *Chrna5*<sup>+</sup>  
505 and *Syt6*<sup>+</sup> neurons. Consistent with such complex regulation by lynxes, our experiments  
506 confirmed that removing GPI-anchored lynxes increases nicotinic response onset speed and  
507 amplitude in layer 6 neurons, potentially due to removal of *Lynx1*. In contrast, exogenous  
508 application of recombinant *Ly6g6e* protein had different effects in *Chrna5* and *Syt6*-expressing  
509 neurons, consistent with the differential lynx modulation in *Chrna5*<sup>+</sup> neurons predicted by  
510 transcriptomics.

511



512 ***Functional consequences***

513 The effects of lynxes on nicotinic receptor function have so far been determined by heterologous  
514 expression systems (39, 61), knockout studies (61, 81), exogenous application of recombinant  
515 water-soluble lynx proteins (86, 87), and more recently viral overexpression in the brain (42, 88).  
516 Our results highlight complex endogenous regulation of optogenetic nicotinic responses by  
517 multiple GPI-anchored lynxes. Expression of inhibitory lynxes and high levels of  
518 acetylcholinesterase in *Chrna5*<sup>+</sup> neurons suggest that their responses are restrained and our  
519 experiments likely underestimated their nicotinic receptor function. These responses could be  
520 dramatically enhanced when acetylcholinesterase and inhibitory lynx modulation is reduced  
521 through other signaling mechanisms. Such flexible tuning of nicotinic responses by lynx  
522 prototoxins in *Chrna5*<sup>+</sup> neurons can provide greater dynamic range and poises them to be key  
523 players during attentional processing (Fig 9). A recent study found that developmental increase in  
524 *Lynx1* expression in corticocortical neurons suppressed their nicotinic responses and preventing  
525 this by viral knockdown of *Lynx1* led to altered cortical connectivity and impaired attention (42).  
526 Thus cell-type specific changes in lynx expression during development are critical for maturation  
527 of attention circuits. It is of interest to examine such changes during development in *Chrna5*<sup>+</sup>  
528 neurons and how they differ from *Syt6*<sup>+</sup> neurons.

529 Our study reveals a distinct group of ‘acetylcholine super-responder’ neurons in the prefrontal  
530 cortex identified by *Chrna5*-expression that include subplate neurons vital for cortical  
531 development. We identify that their high affinity  $\alpha 5$  subunit-containing nicotinic receptors are  
532 under complex regulation by several lynx prototoxins and acetylcholinesterase. *Chrna5*-Cre mice  
533 are a valuable tool for future studies examining the in vivo role of these specialized neurons.

## 534 **References**

- 535 1. J. W. Dalley, R. N. Cardinal, T. W. Robbins, Prefrontal executive and cognitive functions in  
536 rodents: neural and neurochemical substrates. *Neuroscience & Biobehavioral Reviews*. **28**, 771–  
537 784 (2004).
- 538 2. J. McGaughy, J. W. Dalley, C. H. Morrison, B. J. Everitt, T. W. Robbins, T.W. Robbins, Selective  
539 behavioral and neurochemical effects of cholinergic lesions produced by intrabasalis infusions of  
540 192 IgG-saporin on attentional performance in a five-choice serial reaction time task. *J Neurosci*.  
541 **22**, 1905–13 (2002).
- 542 3. J. W. Dalley, D. E. Theobald, P. Bouger, Y. Chudasama, R. N. Cardinal, T. W. Robbins, Cortical  
543 Cholinergic Function and Deficits in Visual Attentional Performance in Rats Following 192 IgG-  
544 Saporin-induced Lesions of the Medial Prefrontal Cortex. *Cerebral Cortex*. **14**, 922–932 (2004).
- 545 4. H. J. Gritton, W. M. Howe, C. S. Mallory, V. L. Hetrick, J. D. Berke, M. Sarter, Cortical  
546 cholinergic signaling controls the detection of cues. *Proc Natl Acad Sci U S A*. **113**, E1089-97  
547 (2016).
- 548 5. F. Briggs, W. M. Usrey, Emerging views of corticothalamic function. *Current Opinion in*  
549 *Neurobiology*. **18** (2008), pp. 403–407.
- 550 6. J. Voigts, C. A. Deister, C. I. Moore, Layer 6 ensembles can selectively regulate the behavioral  
551 impact and layer-specific representation of sensory deviants. *Elife*. **9** (2020),  
552 doi:10.7554/eLife.48957.
- 553 7. T. Spellman, M. Svei, J. Kaminsky, G. Manzano-Nieves, C. Liston, Prefrontal deep projection  
554 neurons enable cognitive flexibility via persistent feedback monitoring. *Cell*. **184**, 2750-2766.e17  
555 (2021).
- 556 8. S. M. Kassam, P. M. Herman, N. M. Goodfellow, N. C. Alves, E. K. Lambe, Developmental  
557 excitation of corticothalamic neurons by nicotinic acetylcholine receptors. *J Neurosci*. **28**, 8756–  
558 64 (2008).
- 559 9. D. W. Sparks, M. K. Tian, D. Sargin, S. Venkatesan, K. Intson, E. K. Lambe, Opposing  
560 cholinergic and serotonergic modulation of layer 6 in prefrontal cortex. *Frontiers in Neural*  
561 *Circuits*. **11** (2018), doi:10.3389/fncir.2017.00107.
- 562 10. S. Venkatesan, H.-S. Jeung, T. Chen, S. K. Power, Y. Liu, E. K. Lambe, in *Behavioral*  
563 *Pharmacology of the Cholinergic System* (Springer, Berlin, Heidelberg, 2020), pp. 47–69.
- 564 11. U. H. Winzer-Serhan, F. M. Leslie, Expression of alpha5 nicotinic acetylcholine receptor subunit  
565 mRNA during hippocampal and cortical development. *The Journal of Comparative Neurology*.  
566 **481**, 19–30 (2005).
- 567 12. E. Wada, D. McKinnon, S. Heinemann, J. Patrick, L. W. Swanson, The distribution of mRNA  
568 encoded by a new member of the neuronal nicotinic acetylcholine receptor gene family ( $\alpha 5$ ) in the  
569 rat central nervous system. *Brain Research*. **526**, 45–53 (1990).
- 570 13. C. D. C. Bailey, M. De Biasi, P. J. Fletcher, E. K. Lambe, The nicotinic acetylcholine receptor  
571 alpha5 subunit plays a key role in attention circuitry and accuracy. *J Neurosci*. **30**, 9241–52  
572 (2010).

- 573 14. M. K. Tian, C. D. C. Bailey, M. De Biasi, M. R. Picciotto, E. K. Lambe, Plasticity of prefrontal  
574 attention circuitry: upregulated muscarinic excitability in response to decreased nicotinic signaling  
575 following deletion of  $\alpha 5$  or  $\beta 2$  subunits. *J Neurosci.* **31**, 16458–63 (2011).
- 576 15. W. M. Howe, J. L. Brooks, P. L. Tierney, J. Pang, A. Rossi, D. Young, K. Dlugolenski, E.  
577 Guillmette, M. Roy, K. Hales, R. Kozak,  $\alpha 5$  nAChR modulation of the prefrontal cortex makes  
578 attention resilient. *Brain Structure and Function.* **223**, 1035–1047 (2018).
- 579 16. S. Venkatesan, E. K. Lambe, Chrna5 is essential for a rapid and protected response to optogenetic  
580 release of endogenous acetylcholine in prefrontal cortex. *The Journal of Neuroscience.* **40**, 7255–  
581 7268 (2020).
- 582 17. W. Han, T. Zhang, T. Ni, L. Zhu, D. Liu, G. Chen, H. Lin, T. Chen, F. Guan, Relationship of  
583 common variants in CHRNA5 with early-onset schizophrenia and executive function.  
584 *Schizophrenia Research.* **206**, 407–412 (2019).
- 585 18. L. J. Bierut, J. A. Stitzel, J. C. Wang, A. L. Hinrichs, R. A. Grucza, X. Xuei, N. L. Saccone, S. F.  
586 Saccone, S. Bertelsen, L. Fox, W. J. Horton, S. D. Morgan, N. Breslau, J. Budde, C. R. Cloninger,  
587 D. M. Dick, T. Foroud, D. Hatsukami, V. Hesselbrock, E. O. Johnson, J. Kramer, S. Kuperman, P.  
588 A. F. Madden, K. Mayo, J. Nurnberger, Jr., O. Pomerleau, B. Porjesz, O. Reyes, M. Schuckit, G.  
589 Swan, J. A. Tischfield, H. J. Edenberg, J. P. Rice, A. M. Goate, Variants in the Nicotinic  
590 Receptors Alter the Risk for Nicotine Dependence. *Am J Psychiatry.* **165**, 1163 (2008).
- 591 19. J. B. Schuch, E. R. Polina, D. L. Rovaris, D. B. Kappel, N. R. Mota, R. B. Cupertino, K. L. Silva,  
592 P. O. Guimarães-da-Silva, R. G. Karam, C. A. I. Salgado, M. J. White, L. A. Rohde, E. H. Grevet,  
593 C. H. D. Bau, Pleiotropic effects of Chr15q25 nicotinic gene cluster and the relationship between  
594 smoking, cognition and ADHD. *Journal of Psychiatric Research.* **80**, 73–78 (2016).
- 595 20. U. Maskos, The nicotinic receptor alpha5 coding polymorphism rs16969968 as a major target in  
596 disease: Functional dissection and remaining challenges. *Journal of Neurochemistry.* **154**, 241–  
597 250 (2020).
- 598 21. P. Scholze, S. Huck, The  $\alpha 5$  Nicotinic Acetylcholine Receptor Subunit Differentially Modulates  
599  $\alpha 4\beta 2^*$  and  $\alpha 3\beta 4^*$  Receptors. *Frontiers in Synaptic Neuroscience.* **12** (2020), p. 607959.
- 600 22. M. S. Prevost, H. Bouchenaki, N. Barilone, M. Gielen, P. J. Corringer, Concatemers to re-  
601 investigate the role of  $\alpha 5$  in  $\alpha 4\beta 2$  nicotinic receptors. *Cellular and Molecular Life Sciences 2020*  
602 *78:3.* **78**, 1051–1064 (2020).
- 603 23. A. M. Thomson, Neocortical layer 6, a review. *Front Neuroanat.* **4**, 13 (2010).
- 604 24. F. Briggs, Organizing principles of cortical layer 6. *Front Neural Circuits.* **4**, 3 (2010).
- 605 25. S. A. Sorensen, A. Bernard, V. Menon, J. J. Royall, K. J. Glattfelder, T. Desta, K. Hirokawa, M.  
606 Mortrud, J. A. Miller, H. Zeng, J. G. Hohmann, A. R. Jones, E. S. Lein, Correlated Gene  
607 Expression and Target Specificity Demonstrate Excitatory Projection Neuron Diversity. *Cerebral*  
608 *Cortex.* **25**, 433–449 (2015).
- 609 26. C. J. Heath, S. L. King, C. Gotti, M. J. Marks, M. R. Picciotto, Cortico-Thalamic Connectivity is  
610 Vulnerable to Nicotine Exposure During Early Postnatal Development through  $\alpha 4/\beta 2/\alpha 5$  Nicotinic  
611 Acetylcholine Receptors. *Neuropsychopharmacology.* **35**, 2324–2338 (2010).

- 612 27. J. A. Harris, K. E. Hirokawa, S. A. Sorensen, H. Gu, M. Mills, L. L. Ng, P. Bohn, M. Mortrud, B.  
613 Ouellette, J. Kidney, K. A. Smith, C. Dang, S. Sunkin, A. Bernard, S. W. Oh, L. Madisen, H.  
614 Zeng, Anatomical characterization of Cre driver mice for neural circuit mapping and  
615 manipulation. *Frontiers in Neural Circuits*. **8**, 76 (2014).
- 616 28. J. A. Harris, S. Mihalas, K. E. Hirokawa, J. D. Whitesell, H. Choi, A. Bernard, P. Bohn, S.  
617 Caldejon, L. Casal, A. Cho, A. Feiner, D. Feng, N. Gaudreault, C. R. Gerfen, N. Graddis, P. A.  
618 Groblewski, A. M. Henry, A. Ho, R. Howard, J. E. Knox, L. Kuan, X. Kuang, J. Lecoq, P. Lesnar,  
619 Y. Li, J. Luviano, S. McConoughey, M. T. Mortrud, M. Naeemi, L. Ng, S. W. Oh, B. Ouellette, E.  
620 Shen, S. A. Sorensen, W. Wakeman, Q. Wang, Y. Wang, A. Williford, J. W. Phillips, A. R. Jones,  
621 C. Koch, H. Zeng, Hierarchical organization of cortical and thalamic connectivity. *Nature*. **575**,  
622 195–202 (2019).
- 623 29. A. R. Nectow, M. V. Moya, M. I. Ekstrand, A. Mousa, K. L. McGuire, C. E. Sferrazza, B. C.  
624 Field, G. S. Rabinowitz, K. Sawicka, Y. Liang, J. M. Friedman, N. Heintz, E. F. Schmidt, Rapid  
625 Molecular Profiling of Defined Cell Types Using Viral TRAP. *Cell Reports*. **19**, 655–667 (2017).
- 626 30. H. Nakayama, I. Ibañez-Tallon, N. Heintz, Cell-type-specific contributions of medial prefrontal  
627 neurons to flexible behaviors. *Journal of Neuroscience*. **38**, 4490–4504 (2018).
- 628 31. L. O. Vaasjo, X. Han, A. N. Thurmon, A. S. Tiemroth, H. Berndt, M. Korn, A. Figueroa, R.  
629 Reyes, P. A. Feliciano-Ramos, M. J. Galazo, Characterization and manipulation of  
630 Corticothalamic neurons in associative cortices using Syt6-Cre transgenic mice. *Journal of*  
631 *Comparative Neurology* (2021), doi:10.1002/CNE.25256.
- 632 32. M. K. Tian, C. D. C. Bailey, E. K. Lambe, Cholinergic excitation in mouse primary vs. associative  
633 cortex: region-specific magnitude and receptor balance. *Eur J Neurosci*. **40**, 2608–18 (2014).
- 634 33. J. L. Ables, A. Görlich, B. Antolin-Fontes, C. Wang, S. M. Lipford, M. H. Riad, J. Ren, F. Hu, M.  
635 Luo, P. J. Kenny, N. Heintz, I. Ibañez-Tallon, Retrograde inhibition by a specific subset of  
636 interpeduncular  $\alpha 5$  nicotinic neurons regulates nicotine preference. *Proc Natl Acad Sci U S A*. **114**,  
637 13012–13017 (2017).
- 638 34. G. Morton, N. Nasirova, D. W. Sparks, M. Brodsky, S. Sivakumaran, E. K. Lambe, E. E. Turner,  
639 Chrna5-expressing neurons in the interpeduncular nucleus mediate aversion primed by prior  
640 stimulation or nicotine exposure. *J Neurosci*, 0023–18 (2018).
- 641 35. A. Hoerder-Suabedissen, Z. Molnár, Molecular Diversity of Early-Born Subplate Neurons.  
642 *Cerebral Cortex*. **23**, 1473–1483 (2013).
- 643 36. H. J. Luhmann, S. Kirischuk, W. Kilb, The superior function of the subplate in early neocortical  
644 development. *Frontiers in Neuroanatomy*. **12**, 97 (2018).
- 645 37. P. O. Kanold, H. J. Luhmann, The Subplate and Early Cortical Circuits.  
646 <http://dx.doi.org/10.1146/annurev-neuro-060909-153244>. **33**, 23–48 (2010).
- 647 38. J. M. Miwa, K. R. Anderson, K. M. Hoffman, Lynx Prototoxins: Roles of Endogenous  
648 Mammalian Neurotoxin-Like Proteins in Modulating Nicotinic Acetylcholine Receptor Function  
649 to Influence Complex Biological Processes. *Frontiers in Pharmacology*. **10**, 343 (2019).

- 650 39. M. Wu, C. A. Puddifoot, P. Taylor, W. J. Joiner, Mechanisms of inhibition and potentiation of  
651  $\alpha 4\beta 2$  nicotinic acetylcholine receptors by members of the Ly6 protein family. *J Biol Chem.* **290**,  
652 24509–18 (2015).
- 653 40. M. P. Demars, H. Morishita, Cortical parvalbumin and somatostatin GABA neurons express  
654 distinct endogenous modulators of nicotinic acetylcholine receptors. *Molecular Brain.* **7**, 75  
655 (2014).
- 656 41. J. M. Miwa, Lynx1 prototoxins: critical accessory proteins of neuronal nicotinic acetylcholine  
657 receptors. *Current Opinion in Pharmacology.* **56**, 46–51 (2021).
- 658 42. E. N. Falk, K. J. Norman, Y. Garkun, M. P. Demars, S. Im, G. Taccheri, J. Short, K. Caro, S. E.  
659 Mccraney, C. Cho, M. R. Smith, H.-M. Lin, H. Koike, J. Bateh, P. Maccario, L. Waltrip, M. Janis,  
660 H. Morishita, Nicotinic regulation of local and long-range input balance drives top-down  
661 attentional circuit maturation. *Sci. Adv.* **7** (2021).
- 662 43. K. R. Anderson, K. M. Hoffman, J. M. Miwa, Modulation of cholinergic activity through lynx  
663 prototoxins: Implications for cognition and anxiety regulation. *Neuropharmacology.* **174** (2020),  
664 p. 108071.
- 665 44. S. Gong, M. Doughty, C. R. Harbaugh, A. Cummins, M. E. Hatten, N. Heintz, C. R. Gerfen,  
666 Targeting Cre recombinase to specific neuron populations with bacterial artificial chromosome  
667 constructs. *Journal of Neuroscience.* **27** (2007), pp. 9817–9823.
- 668 45. S. Gong, C. Zheng, M. L. Doughty, K. Losos, N. Didkovsky, U. B. Schambra, N. J. Nowak, A.  
669 Joyner, G. Leblanc, M. E. Hatten, N. Heintz, A gene expression atlas of the central nervous system  
670 based on bacterial artificial chromosomes. *Nature.* **425**, 917–925 (2003).
- 671 46. L. Madisen, T. A. Zwingman, S. M. Sunkin, S. Wook Oh, H. A. Zariwala, H. Gu, L. L. Ng, R. D.  
672 Palmiter, M. J. Hawrylycz, A. R. Jones, E. S. Lein, H. Zeng, A robust and high-throughput Cre  
673 reporting and characterization system for the whole mouse brain (2010), doi:10.1038/nn.2467.
- 674 47. Y. S. Bae, T. G. Lee, J. C. Park, J. H. Hur, Y. Kim, K. Heo, J. Y. Kwak, P. G. Suh, S. H. Ryu,  
675 Identification of a Compound That Directly Stimulates Phospholipase C Activity. *Molecular*  
676 *Pharmacology.* **63**, 1043–1050 (2003).
- 677 48. B. Tasic, Z. Yao, L. T. Graybuck, K. A. Smith, T. N. Nguyen, D. Bertagnolli, J. Goldy, E. Garren,  
678 M. N. Economo, S. Viswanathan, O. Penn, T. Bakken, V. Menon, J. Miller, O. Fong, K. E.  
679 Hirokawa, K. Lathia, C. Rimorin, M. Tieu, R. Larsen, T. Casper, E. Barkan, M. Kroll, S. Parry, N.  
680 V. Shapovalova, D. Hirschstein, J. Pendergraft, H. A. Sullivan, T. K. Kim, A. Szafer, N. Dee, P.  
681 Groblewski, I. Wickersham, A. Cetin, J. A. Harris, B. P. Levi, S. M. Sunkin, L. Madisen, T. L.  
682 Daigle, L. Looger, A. Bernard, J. Phillips, E. Lein, M. Hawrylycz, K. Svoboda, A. R. Jones, C.  
683 Koch, H. Zeng, Shared and distinct transcriptomic cell types across neocortical areas. *Nature.* **563**,  
684 72–78 (2018).
- 685 49. Z. Yao, C. T. J. van Velthoven, T. N. Nguyen, J. Goldy, A. E. Seden-Cortes, F. Baftizadeh, D.  
686 Bertagnolli, T. Casper, M. Chiang, K. Crichton, S.-L. Ding, O. Fong, E. Garren, A. Glandon, N.  
687 W. Gouwens, J. Gray, L. T. Graybuck, M. J. Hawrylycz, D. Hirschstein, M. Kroll, K. Lathia, C.  
688 Lee, B. Levi, D. McMillen, S. Mok, T. Pham, Q. Ren, C. Rimorin, N. Shapovalova, J. Sulc, S. M.  
689 Sunkin, M. Tieu, A. Torkelson, H. Tung, K. Ward, N. Dee, K. A. Smith, B. Tasic, H. Zeng, A



- 690 taxonomy of transcriptomic cell types across the isocortex and hippocampal formation. *Cell*  
691 (2021), doi:10.1016/j.cell.2021.04.021.
- 692 50. J. Ho, T. Tumkaya, S. Aryal, H. Choi, A. Claridge-Chang, Moving beyond P values: data analysis  
693 with estimation graphics. *Nature Methods*. **16** (2019), pp. 565–566.
- 694 51. A. R. Nectow, M. V. Moya, M. I. Ekstrand, A. Mousa, K. L. McGuire, C. E. Sferrazza, B. C.  
695 Field, G. S. Rabinowitz, K. Sawicka, Y. Liang, J. M. Friedman, N. Heintz, E. F. Schmidt, Rapid  
696 Molecular Profiling of Defined Cell Types Using Viral TRAP. *Cell Reports*. **19**, 655–667 (2017).
- 697 52. L. Huang, P. Ledochowitsch, U. Knoblich, J. Lecoq, G. J. Murphy, R. C. Reid, S. E. J. de Vries,  
698 C. Koch, H. Zeng, M. A. Buice, J. Waters, L. Li, Relationship between simultaneously recorded  
699 spiking activity and fluorescence signal in *gcamp6* transgenic mice. *Elife*. **10** (2021),  
700 doi:10.7554/ELIFE.51675.
- 701 53. C. Grienberger, A. Konnerth, Imaging Calcium in Neurons. *Neuron*. **73**, 862–885 (2012).
- 702 54. J. C. Webster, M. M. Francis, J. K. Porter, G. Robinson, C. Stokes, B. Horenstein, R. L. Papke,  
703 Antagonist activities of mecamylamine and nicotine show reciprocal dependence on beta subunit  
704 sequence in the second transmembrane domain. *British Journal of Pharmacology*. **127**, 1337–1348  
705 (1999).
- 706 55. R. L. Papke, C. Stokes, P. Muldoon, M. Imad Damaj, Similar activity of mecamylamine  
707 stereoisomers in vitro and in vivo. *Eur J Pharmacol*. **720**, 264 (2013).
- 708 56. B. Tasic, V. Menon, T. N. Nguyen, T. K. Kim, T. Jarsky, Z. Yao, B. Levi, L. T. Gray, S. A.  
709 Sorensen, T. Dolbeare, D. Bertagnolli, J. Goldy, N. Shapovalova, S. Parry, C. Lee, K. Smith, A.  
710 Bernard, L. Madisen, S. M. Sunkin, M. Hawrylycz, C. Koch, H. Zeng, Adult mouse cortical cell  
711 taxonomy revealed by single cell transcriptomics. *Nature Neuroscience*. **19**, 335–346 (2016).
- 712 57. D. Yang, R. Günter, G. Qi, G. Radnikow, D. Feldmeyer, Muscarinic and Nicotinic Modulation of  
713 Neocortical Layer 6A Synaptic Microcircuits Is Cooperative and Cell-Specific. *Cerebral Cortex*.  
714 **30**, 3528–3542 (2020).
- 715 58. F. Ghezzi, A. Marques-Smith, P. G. Anastasiades, D. Lyngholm, C. Vagnoni, A. Rowett, G.  
716 Parameswaran, A. Hoerder-Suabedissen, Y. Nakagawa, Z. Molnar, S. J. B. Butt, Non-canonical  
717 role for *lpar1-egfp* subplate neurons in early postnatal mouse somatosensory cortex. *Elife*. **10**  
718 (2021), doi:10.7554/ELIFE.60810.
- 719 59. J. M. Wess, A. Isaiah, P. V. Watkins, P. O. Kanold, Subplate neurons are the first cortical neurons  
720 to respond to sensory stimuli. *Proc Natl Acad Sci U S A*. **114**, 12602–12607 (2017).
- 721 60. V. Ochoa, A. A. George, R. Nishi, P. Whiteaker, The prototoxin LYPD6B modulates heteromeric  
722  $\alpha 3\beta 4$ -containing nicotinic acetylcholine receptors, but not  $\alpha 7$  homomers. *The FASEB Journal*. **30**,  
723 1109–1119 (2016).
- 724 61. A. B. Tekinay, Y. Nong, J. M. Miwa, I. Lieberam, I. Ibanez-Tallon, P. Greengard, N. Heintz, A  
725 role for *LYNX2* in anxiety-related behavior. *Proc Natl Acad Sci U S A*. **106**, 4477 (2009).
- 726 62. J. Krjukova, T. Holmqvist, A. S. Danis, K. E. O. Åkerman, J. P. Kukkonen, Phospholipase C  
727 activator m-3M3FBS affects  $Ca^{2+}$  homeostasis independently of phospholipase C activation.  
728 *British Journal of Pharmacology*. **143**, 3–7 (2004).

- 729 63. R. M. Sturgeon, N. S. Magoski, A Closely Associated Phospholipase C Regulates Cation Channel  
730 Function through Phosphoinositide Hydrolysis. *Journal of Neuroscience*. **38**, 7622–7634 (2018).
- 731 64. L. F. Horowitz, W. Hirdes, B.-C. Suh, D. W. Hilgemann, K. Mackie, B. Hille, Phospholipase C in  
732 Living Cells Activation, Inhibition, Ca<sup>2+</sup> Requirement, and Regulation of M Current. *Journal of*  
733 *General Physiology*. **126**, 243–262 (2005).
- 734 65. A. Kuryatov, J. Onksen, J. Lindstrom, Roles of accessory subunits in  $\alpha 4\beta 2^*$  nicotinic receptors.  
735 *Molecular Pharmacology* (2008), doi:10.1124/mol.108.046789.
- 736 66. W. M. Howe, J. L. Brooks, P. L. Tierney, J. Pang, A. Rossi, D. Young, K. Dlugolenski, E.  
737 Guillmette, M. Roy, K. Hales, R. Kozak,  $\alpha 5$  nAChR modulation of the prefrontal cortex makes  
738 attention resilient. *Brain Structure and Function*. **223**, 1035–1047 (2018).
- 739 67. W. Guo, A. R. Clause, A. Barth-Maron, D. B. P. Correspondence, D. B. Polley, A Corticothalamic  
740 Circuit for Dynamic Switching between Feature Detection and Discrimination Article A  
741 Corticothalamic Circuit for Dynamic Switching between Feature Detection and Discrimination.  
742 *Neuron*. **95**, 180–194 (2017).
- 743 68. D. P. Collins, P. G. Anastasiades, J. J. Marlin, A. G. Carter, Reciprocal Circuits Linking the  
744 Prefrontal Cortex with Dorsal and Ventral Thalamic Nuclei. *Neuron* (2018),  
745 doi:10.1016/j.neuron.2018.03.024.
- 746 69. M. K. Tian, E. F. Schmidt, E. K. Lambe, *eNeuro*, in press, doi:10.1523/ENEURO.0269-16.2016.
- 747 70. D. S. Bortone, S. R. Olsen, M. Scanziani, Translaminar inhibitory cells recruited by layer 6  
748 corticothalamic neurons suppress visual cortex. *Neuron*. **82**, 474–485 (2014).
- 749 71. J. Kim, C. J. Matney, A. Blankenship, S. Hestrin, S. P. Brown, Layer 6 Corticothalamic Neurons  
750 Activate a Cortical Output Layer, Layer 5a. *Journal of Neuroscience*. **34**, 9656–9664 (2014).
- 751 72. S. C. Sundberg, S. H. Lindström, G. M. Sanchez, B. Granseth, Cre-expressing neurons in visual  
752 cortex of Ntsr1-Cre GN220 mice are corticothalamic and are depolarized by acetylcholine.  
753 *Journal of Comparative Neurology*. **526**, 120–132 (2018).
- 754 73. Z. Molnár, H. J. Luhmann, P. O. Kanold, Transient cortical circuits match spontaneous and  
755 sensory-driven activity during development. *Science*. **370** (2020), doi:10.1126/science.abb2153.
- 756 74. M. Marx, G. Qi, I. L. Hanganu-Opatz, W. Kilb, H. J. Luhmann, D. Feldmeyer, Neocortical Layer  
757 6B as a Remnant of the Subplate - A Morphological Comparison. *Cerebral Cortex*. **27**, 1011–1026  
758 (2017).
- 759 75. N. Mechawar, L. Descarries, The cholinergic innervation develops early and rapidly in the rat  
760 cerebral cortex: a quantitative immunocytochemical study. *Neuroscience*. **108**, 555–567 (2001).
- 761 76. A. Hoerder-Suabedissen, W. Z. Wang, S. Lee, K. E. Davies, A. M. Goffinet, S. Rakić, J.  
762 Parnavelas, K. Reim, M. Nicolić, O. Paulsen, Z. Molnár, Novel Markers Reveal Subpopulations of  
763 Subplate Neurons in the Murine Cerebral Cortex. *Cerebral Cortex*. **19**, 1738–1750 (2009).
- 764 77. S. Y. X. Tiong, Y. Oka, T. Sasaki, M. Taniguchi, M. Doi, H. Akiyama, M. Sato, Kcnab1 is  
765 expressed in subplate neurons with unilateral long-range inter-areal projections. *Frontiers in*  
766 *Neuroanatomy*. **13**, 39 (2019).

- 767 78. A. Hoerder-Suabedissen, F. M. Oeschger, M. L. Krishnan, T. G. Belgard, W. Z. Wang, S. Lee, C.  
768 Webber, E. Petretto, A. D. Edwards, Z. Molnár, Expression profiling of mouse subplate reveals a  
769 dynamic gene network and disease association with autism and schizophrenia. *Proc Natl Acad Sci*  
770 *U S A.* **110**, 3555–3560 (2013).
- 771 79. T. A. Zolnik, J. Ledderose, M. Toumazou, T. Trimbuch, T. Oram, C. Rosenmund, B. J. Eickholt,  
772 R. N. S. Sachdev, M. E. Larkum, Layer 6b Is Driven by Intracortical Long-Range Projection  
773 Neurons. *Cell Reports.* **30**, 3492-3505.e5 (2020).
- 774 80. R. Egger, R. T. Narayanan, J. M. Guest, A. Bast, D. Udvary, L. F. Messore, S. Das, C. P. J. de  
775 Kock, M. Oberlaender, Cortical Output Is Gated by Horizontally Projecting Neurons in the Deep  
776 Layers. *Neuron.* **105**, 122-137.e8 (2020).
- 777 81. Y. Sherafat, E. Chen, V. Lallai, M. Bautista, J. P. Fowler, Y. C. Chen, J. Miwa, C. D. Fowler,  
778 Differential Expression Patterns of Lynx Proteins and Involvement of Lynx1 in Prepulse  
779 Inhibition. *Frontiers in Behavioral Neuroscience.* **15** (2021), doi:10.3389/FNBEH.2021.703748.
- 780 82. W. A. Nichols, B. J. Henderson, C. Yu, R. L. Parker, C. I. Richards, H. A. Lester, J. M. Miwa,  
781 Lynx1 Shifts  $\alpha 4\beta 2$  Nicotinic Receptor Subunit Stoichiometry by Affecting Assembly in the  
782 Endoplasmic Reticulum \*. *Journal of Biological Chemistry.* **289**, 31423–31432 (2014).
- 783 83. J. M. Miwa, I. Ibañez-Tallon, G. W. Crabtree, R. Sánchez, A. Šali, L. W. Role, N. Heintz, lynx1,  
784 an Endogenous Toxin-like Modulator of Nicotinic Acetylcholine Receptors in the Mammalian  
785 CNS. *Neuron.* **23**, 105–114 (1999).
- 786 84. I. Ibañez-Tallon, J. M. Miwa, H. L. Wang, N. C. Adams, G. W. Crabtree, S. M. Sine, N. Heintz,  
787 Novel modulation of neuronal nicotinic acetylcholine receptors by association with the  
788 endogenous prototoxin lynx1. *Neuron.* **33**, 893–903 (2002).
- 789 85. H. Morishita, J. M. Miwa, N. Heintz, T. K. Hensch, Lynx1, a Cholinergic Brake, Limits Plasticity  
790 in Adult Visual Cortex. *Science (1979).* **330**, 1238–1240 (2010).
- 791 86. M. S. Thomsen, M. Arvaniti, M. M. Jensen, M. A. Shulepko, D. A. Dolgikh, L. H. Pinborg, W.  
792 Härtig, E. N. Lyukmanova, J. D. Mikkelsen, Lynx1 and A $\beta$ 1–42 bind competitively to multiple  
793 nicotinic acetylcholine receptor subtypes. *Neurobiology of Aging.* **46**, 13–21 (2016).
- 794 87. Z. O. Shenkarev, M. A. Shulepko, M. L. Bychkov, D. S. Kulbatskii, O. V. Shlepova, N. A.  
795 Vasilyeva, A. A. Andreev-Andrievskiy, A. S. Popova, E. A. Lagereva, E. V. Loktyushov, S. G.  
796 Koshelev, M. S. Thomsen, D. A. Dolgikh, S. A. Kozlov, P. M. Balaban, M. P. Kirpichnikov, E. N.  
797 Lyukmanova, Water-soluble variant of human Lynx1 positively modulates synaptic plasticity and  
798 ameliorates cognitive impairment associated with  $\alpha 7$ -nAChR dysfunction. *Journal of*  
799 *Neurochemistry.* **155**, 45–61 (2020).
- 800 88. M. Sadahiro, M. P. Demars, P. Burman, P. Yevo, A. Zimmer, H. Morishita, Activation of  
801 Somatostatin Interneurons by Nicotinic Modulator Lypd6 Enhances Plasticity and Functional  
802 Recovery in the Adult Mouse Visual Cortex. *Journal of Neuroscience.* **40**, 5214–5227 (2020).
- 803 89. G. Paxinos, K. Franklin, *Paxinos and Franklin's the Mouse Brain in Stereotaxic Coordinates*  
804 (2004).

805

## 806 **Figure legends**

807 **Figure 1. *Chrna5* expression identifies a distinct population of prefrontal neurons with**  
808 **stronger and faster-onset optogenetic cholinergic responses.** **A,** Breeding scheme to obtain  
809 triple transgenic *Chrna5-Cre<sup>+</sup>Ai14<sup>+</sup>ChAT-ChR2<sup>+</sup>* mice expressing tdTomato in *Chrna5*-  
810 expressing (*Chrna5*<sup>+</sup>) neurons and Channelrhodopsin 2 in cholinergic axons. **B,** Top- Schematic  
811 of coronal mPFC slice with region of interest, adapted from (89). Bottom- two photon imaging (3D  
812 projection) of tdTomato-labeled *Chrna5*<sup>+</sup> neurons and EYFP-labeled cholinergic axons in layer 6  
813 of mPFC slices. **C,** IRDIC (left) and widefield fluorescence (TRITC, right) images of tdTomato  
814 labeled *Chrna5*<sup>+</sup> and unlabeled layer 6 neurons during whole cell patch clamp electrophysiology.  
815 Clearing induced by the pipette is visible. **D,** Average light-evoked endogenous cholinergic  
816 response of labeled *Chrna5*<sup>+</sup> vs neighbouring unlabeled *Chrna5*<sup>-</sup> neurons. Dotted lines are the  
817 slope of the response onset. (Inset) Individual responses are zoomed in to show the onset. **E-F,** Bar  
818 graph comparing (E) Rising slope and (F) Peak current of endogenous cholinergic responses  
819 between labeled *Chrna5*<sup>+</sup> neurons (n = 24 cells) and unlabeled *Chrna5*<sup>-</sup> neurons (n = 15 cells, 4  
820 mice). \**P* < 0.05, Unpaired t-test. Top) **G,** (Top) Breeding scheme to obtain triple transgenic  
821 *Chrna5-Cre<sup>+</sup>Ai14<sup>+</sup>Syt6-EGFP<sup>+</sup>* mice expressing tdTomato in *Chrna5*<sup>+</sup> neurons and EGFP in  
822 *Syt6*<sup>+</sup> neurons (Bottom) Confocal imaging in mPFC slices shows *Chrna5*<sup>+</sup> and *Syt6*<sup>+</sup> neurons  
823 distributed in layer 6. **H-I,** Confocal (H) and two-photon imaging (I) reveal three populations of  
824 neurons: exclusively *Chrna5*<sup>+</sup> neurons which do not express *Syt6*, overlapping *Chrna5*<sup>+</sup>*Syt6*<sup>+</sup>  
825 neurons which express both markers, and exclusively *Syt6*<sup>+</sup> neurons which do not express *Chrna5*.  
826 **J,** Left- Graph quantifies the percentage of each cell type with respect to all labeled cells per  
827 sample. Right- Average proportions of *Chrna5*<sup>+</sup>, *Chrna5*<sup>+</sup>*Syt6*<sup>+</sup> and *Syt6*<sup>+</sup> neurons.

828 **Figure 2. Calcium imaging in *Chrna5*<sup>+</sup> and *Syt6*<sup>+</sup> populations reveals a distinct subset of**  
829 ***Chrna5*<sup>+</sup> neurons with resilient nicotinic responses.** **A,** Top: Two photon calcium imaging in  
830 prefrontal brain slices from *Chrna5-Cre<sup>+</sup>Ai96<sup>+</sup>* (left) and *Syt6-Cre<sup>+</sup>Ai96<sup>+</sup>* mice (right) showing  
831 acetylcholine-evoked GCaMP6s responses in *Chrna5*<sup>+</sup> and *Syt6*<sup>+</sup> neurons respectively (scale 50  
832  $\mu$ m). Bottom: Acetylcholine-evoked GCaMP6s signals were sequentially recorded after  
833 application of competitive nicotinic antagonist DHBE and addition of muscarinic antagonist  
834 atropine (scale 10  $\mu$ m). **B,** Normalized fluorescence signal ( $\Delta F$  by *F*) evoked by acetylcholine in  
835 individual *Chrna5*<sup>+</sup> and *Syt6*<sup>+</sup> neurons in a brain slice at baseline (left), after DHBE (middle), and  
836 after DHBE + Atropine (right). (Inset, average response and standard deviation. Scale: same as  
837 main figure). **C-D i,** Boxplot shows the percentage of response remaining after the application of  
838 (C) DHBE and (D) DHBE + Atropine (Inset shows the same boxplot with a restricted y-axis). +  
839 denote respective means. Responses were quantified by the area under the  $\Delta F/F$  curve (n = 71  
840 neurons, 6 mice for *Chrna5*<sup>+</sup>, and 112 neurons, 7 mice for *Syt6*<sup>+</sup>, \*\*\*\**P* < 10<sup>-4</sup>, Mann-Whitney  
841 test). **C-D ii,** Cumulative frequency distribution of the percentage response remaining after (C)  
842 DHBE and (D) DHBE + Atropine (*P* < 10<sup>-4</sup>, Kolmogorov-Smirnov test). **C-D iii,** Proportion of  
843 cells showing zero and non-zero responses after (C) DHBE and (D) DHBE + Atropine (*P* < 10<sup>-4</sup>  
844 for both C & D, Fisher's exact test). **E,** Current clamp responses evoked by 1mM acetylcholine  
845 (15s) in fluorescently labeled *Chrna5*<sup>+</sup> and *Syt6*<sup>+</sup> layer 6 neurons patched in mPFC slices from  
846 mice *Chrna5-Cre<sup>+</sup> Ai14<sup>+</sup>* and *Syt6-Cre<sup>+</sup> Ai14<sup>+</sup>* or *Syt6-EGFP* mice respectively. **F,** Peak spike  
847 frequency in *Chrna5*<sup>+</sup> and *Syt6*<sup>+</sup> neurons evoked by acetylcholine (left), in the presence of



848 competitive nicotinic antagonist DHBE and atropine (middle). Residual response remaining after  
849 DHBE + Atropine in a distinct subset of *Chrna5*<sup>+</sup> neurons is blocked by non-competitive nicotinic  
850 antagonist mecamylamine (right). (\*\**P* < 0.01, \**P* < 0.05, unpaired t-test).

851 **Figure 3. Single cell transcriptomic analysis reveals *Chrna5*<sup>+</sup> subset to span subplate neuron**  
852 **populations with differential expression of lynx prototoxin genes** **A**, Single cell-RNAseq data  
853 for 2422 L5-6 glutamatergic neurons in the anterior cingulate cortex (ACA, shown in schematic  
854 on the left) was obtained from publicly available datasets (Allen Institute, SMARTSeq ACA and  
855 MOP (2018)). Right- Scatter plot showing *Chrna5* vs *Syt6* expression in log<sub>10</sub> (Copies per million)  
856 for each neuron, with the frequency distribution shown on the corresponding axes. Neurons were  
857 classified into *Chrna5*<sup>+</sup>, *Chrna5*<sup>+</sup>*Syt6*<sup>+</sup> and *Syt6*<sup>+</sup> groups based on their expression of *Chrna5* and  
858 *Syt6* genes. Cells which expressed neither gene were excluded from subsequent analyses. **B**, The  
859 major neuronal subclasses within *Chrna5*<sup>+</sup>, *Chrna5*<sup>+</sup>*Syt6*<sup>+</sup> and *Syt6*<sup>+</sup> groups is indicated by the  
860 colorbar on top. NP- Near projecting, CT- Corticothalamic. Heatmap shows expression of  
861 subplate and corticothalamic marker genes in each cell in all 3 groups. **C**, Dotplot shows summary  
862 of subplate and corticothalamic marker expression in *Chrna5*<sup>+</sup>, *Chrna5*<sup>+</sup>*Syt6*<sup>+</sup> and *Syt6*<sup>+</sup> groups.  
863 Dot size indicates the percentage of cells within each group expressing that gene, color of the dot  
864 indicates average expression level relative to other groups. *Chrna5*<sup>+</sup> neurons highly express  
865 multiple subplate marker genes, but not corticothalamic markers. **D**, Violin plots show expression  
866 of Lynx prototoxins *Ly6g6e*, *Lypd1* (*Lynx2*) and *Lypd6b* which show highest fold-change between  
867 *Chrna5*<sup>+</sup> and *Chrna5*<sup>+</sup>*Syt6*<sup>+</sup> neurons. **E**, Dotplot shows expression of major genes known to  
868 modulate cholinergic function, including nicotinic, muscarinic subunits, acetylcholinesterase, and  
869 lynx prototoxins in *Chrna5*<sup>+</sup>, *Chrna5*<sup>+</sup>*Syt6*<sup>+</sup> and *Syt6*<sup>+</sup> neurons. Genes are ordered by decreasing  
870 fold change in expression. Dot size indicates the percentage of cells within each group expressing  
871 that gene, color of the dot indicates average expression level relative to other groups. Fold change  
872 of all the genes shown in this dotplot are listed in Supplementary table 3

873 **Figure 4. Regulation of optogenetic nicotinic responses by endogenous GPI-anchored lynxes**  
874 **and cell type specific effects of recombinant Ly6g6e.** **A**, Schematic of nicotinic receptor  
875 environment showing endogenous GPI-anchored lynxes exerting positive and negative modulation  
876 of nicotinic receptors. The compound m-3M3FBS activates PLC, cleaving the GPI anchor and  
877 perturbing lynx-mediated modulation of nicotinic responses. **B**, Optogenetic nicotinic responses  
878 in prefrontal deep-layer pyramidal neurons from ChAT-ChR2 mice before and after treatment with  
879 m-3M3FBS (5 min). **C**, PLC activation significantly increased the rising slope of optogenetic  
880 nicotinic responses. Change in **D**, Rising slope and **E**, Area of nicotinic response in control and  
881 after PLC activation. (\**P* < 0.05, \*\**P* < 0.01, Wilcoxon matched-pairs test). **F**, IRDIC (left) and  
882 widefield fluorescence (right) images of tdTomato labeled *Chrna5*<sup>+</sup> (top) and *Syt6*<sup>+</sup> (bottom) deep  
883 layer neurons during whole-cell patch clamp electrophysiology in *Chrna5*-Cre<sup>+</sup>Ai14<sup>+</sup>ChAT-  
884 ChR2<sup>+</sup> and *Syt6*-Cre<sup>+</sup>Ai14<sup>+</sup>ChAT-ChR2<sup>+</sup> mouse brain slices respectively. **G**, Schematic  
885 summarising predicted and observed effects of recombinant water-soluble ly6g6e on *Chrna5*<sup>+</sup> and  
886 *Syt6*<sup>+</sup> neuronal nicotinic receptors. **H**, Optogenetic nicotinic responses are reduced in amplitude  
887 following 10 minute application of soluble ly6g6e in *Syt6*<sup>+</sup> but not *Chrna5*<sup>+</sup> neurons. Change in  
888 peak current (**I**) and area of the nicotinic response (**J**) of *Chrna5*<sup>+</sup> vs *Syt6*<sup>+</sup> neurons (\**P* < 0.05, \*\*  
889 *P* < 0.01, Unpaired t-test)



890 **Figure 5. Graphical summary.** Deep-layer pyramidal neurons can be divided into three groups  
891 (Chrna5+, Chrna5+Syt6+, Syt6+) by their expression of *Chrna5* and *Syt6* genes. The subset of  
892 *Chrna5*-expressing neurons without *Syt6* expression are molecularly distinct and comprise of  
893 subplate neurons, whereas *Syt6*-expressing neurons are of the corticothalamic subtype. Nicotinic  
894 receptors in these neurons are under complex regulation by endogenous lynx prototoxins.  
895 Inhibitory prototoxin gene *Lynx1* is expressed uniformly in all neurons, whereas Chrna5+ subplate  
896 neurons additionally have specific expression of *Ly6g6e*, *Lypd1* and *Lypd6b* prototoxin genes.  
897 These Chrna5+ subplate neurons show enhanced  $\alpha 5$  subunit nicotinic receptor-mediated  
898 cholinergic responses that are differently modulated by specific lynx prototoxins.

899 **Supplementary materials**

900 **Supplementary video 1 & 2:** Videos show **(1)** *Chrna5*<sup>+</sup> neurons in mPFC slices from *Chrna5*-  
901 *Cre*<sup>+</sup>*Ai96*<sup>+</sup> mice and **(2)** *Syt6*<sup>+</sup> neurons from *Syt6-Cre*<sup>+</sup>*Ai96*<sup>+</sup> mice responding to exogenous  
902 application of 1mM acetylcholine with an increase in GCaMP6s fluorescence signal.

903 **Supplementary table 1:** Intrinsic electrophysiological properties of *Chrna5*<sup>+</sup> and *Chrna5*-  
904 unlabeled deep-layer neurons in *Chrna5-Cre*<sup>+</sup>*Ai14*<sup>+</sup>*ChAT-ChR2*<sup>+</sup> mice.

905 **Supplementary table 2:** Intrinsic electrophysiological properties of *Chrna5*<sup>+</sup> and *Syt6*<sup>+</sup> deep-  
906 layer neurons.

907 **Supplementary table 3:** Table comparing expression of major genes modulating postsynaptic  
908 cholinergic responses in *Chrna5*<sup>+</sup> and *Chrna5*<sup>+</sup>*Syt6*<sup>+</sup> neurons.

909 **Supplementary table 4.** Table of all differentially expressed genes between *Chrna5*<sup>+</sup> and  
910 *Chrna5*<sup>+</sup>*Syt6*<sup>+</sup> neurons with adjusted p value < 0.05

## Figures and Tables

### Figure 1

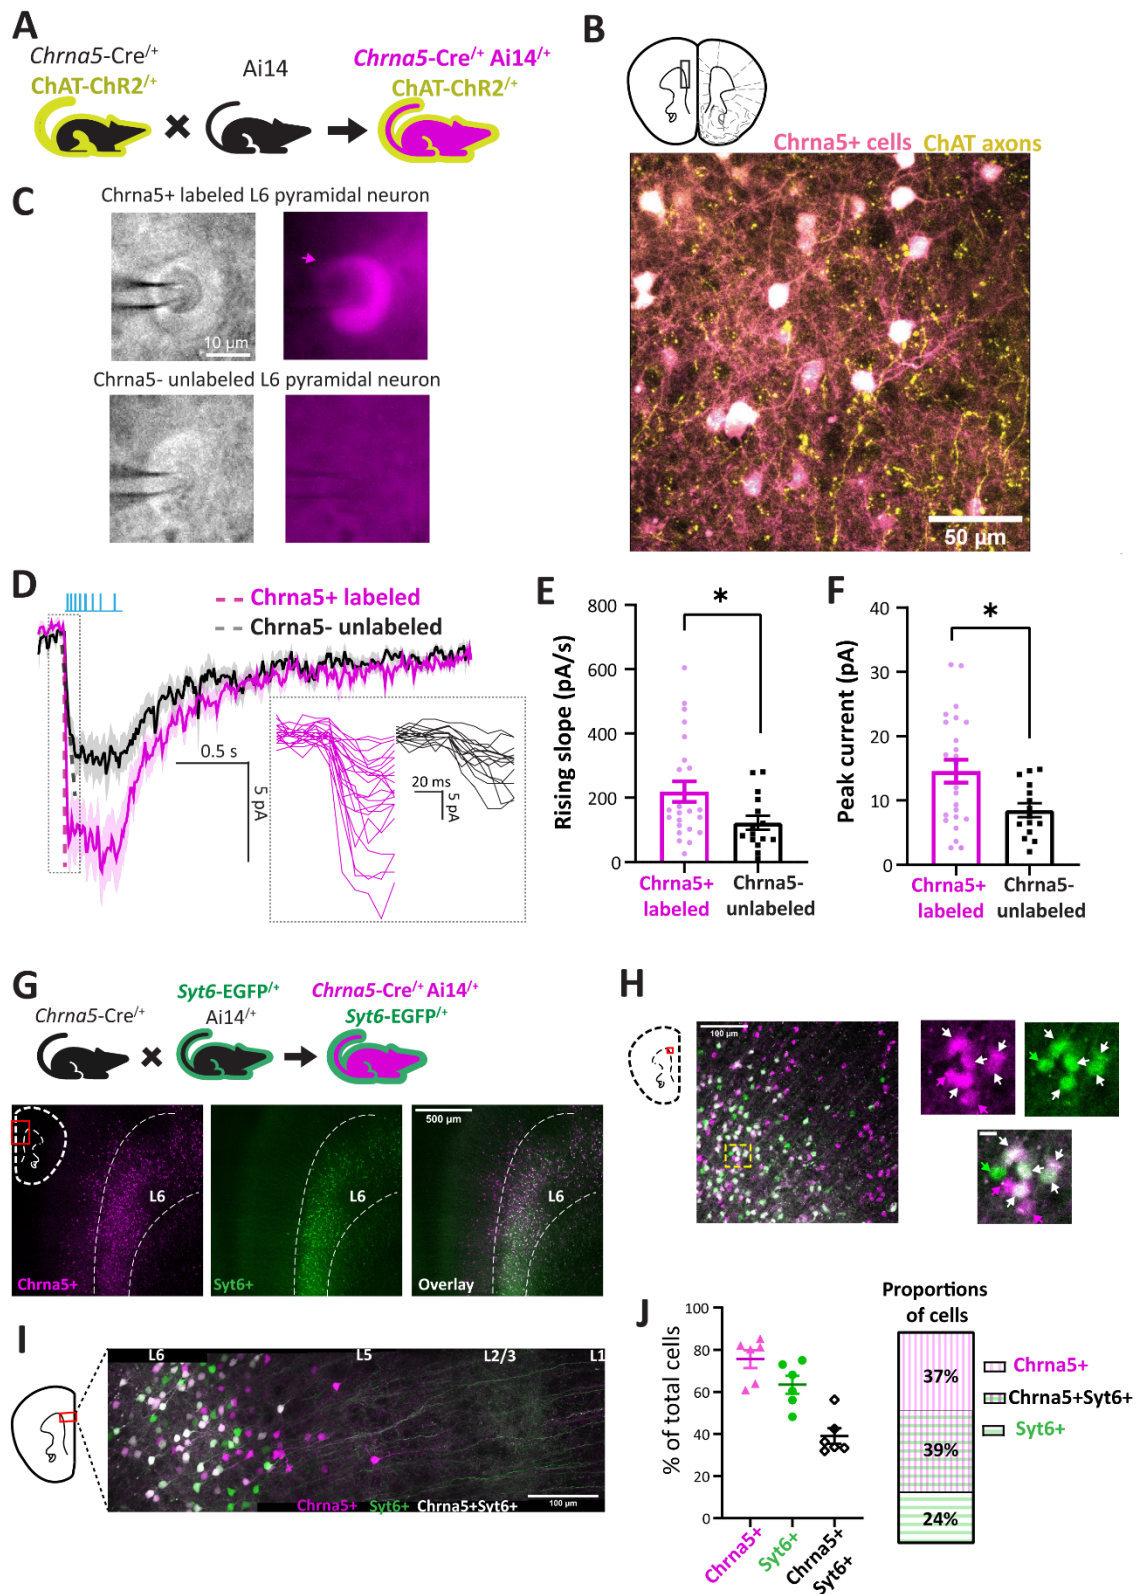

**Figure 2**

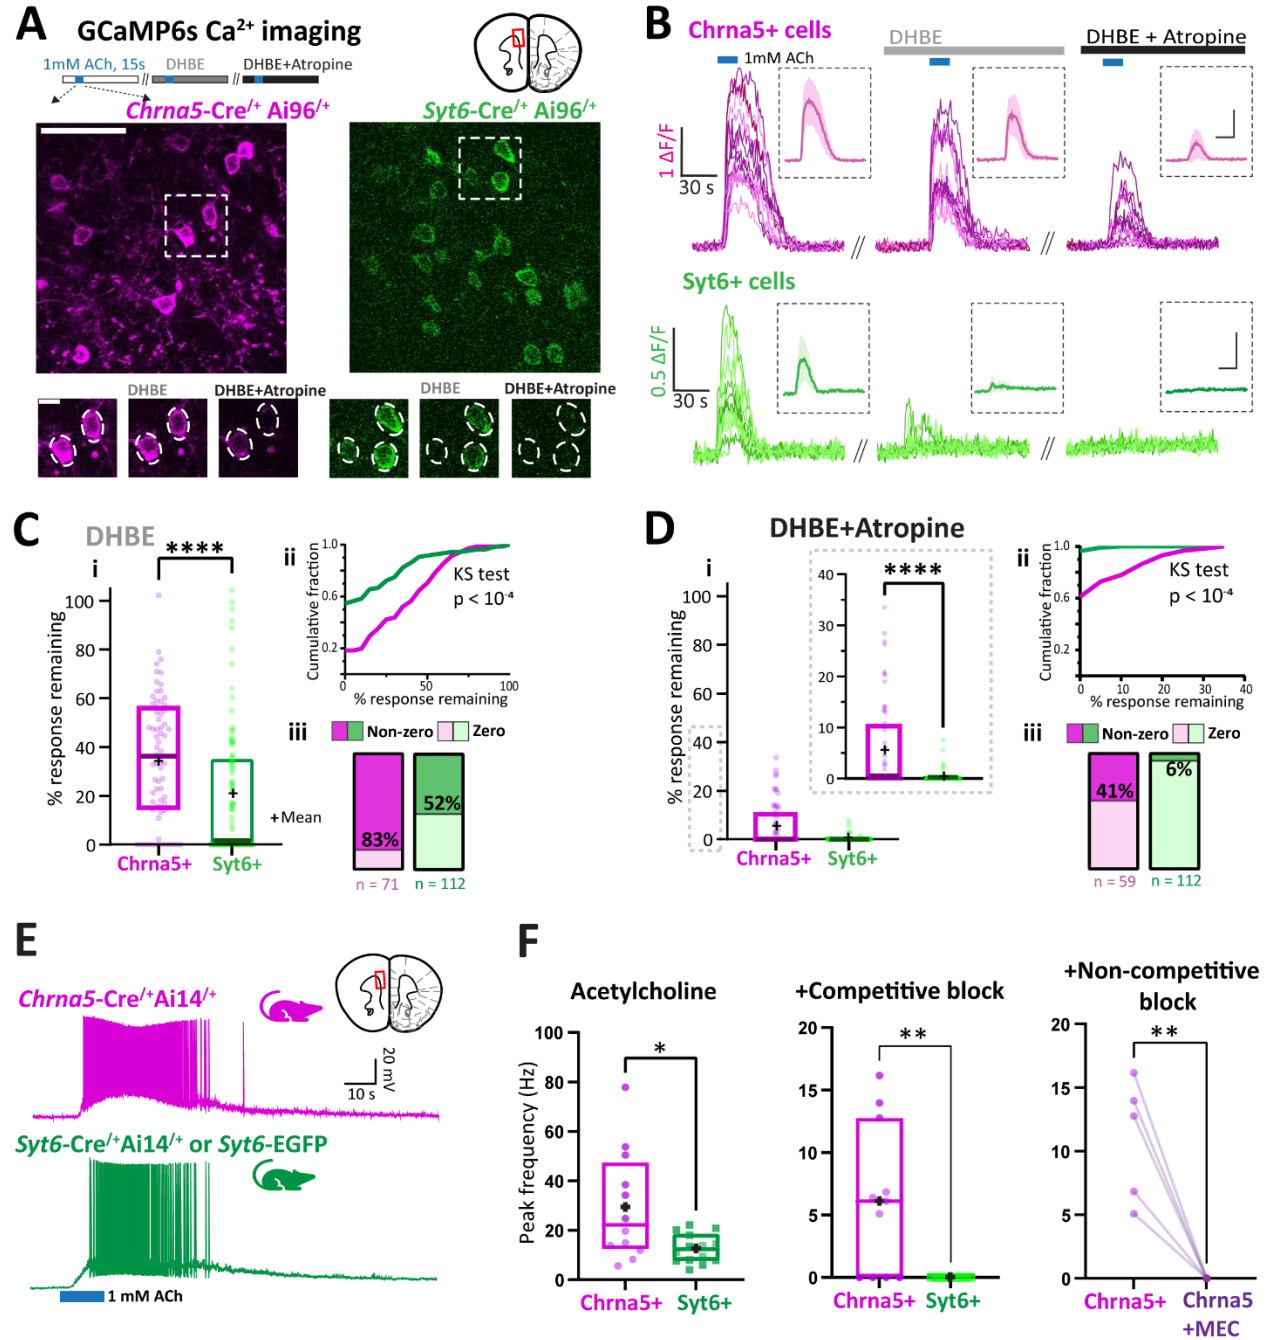

**Figure 3**

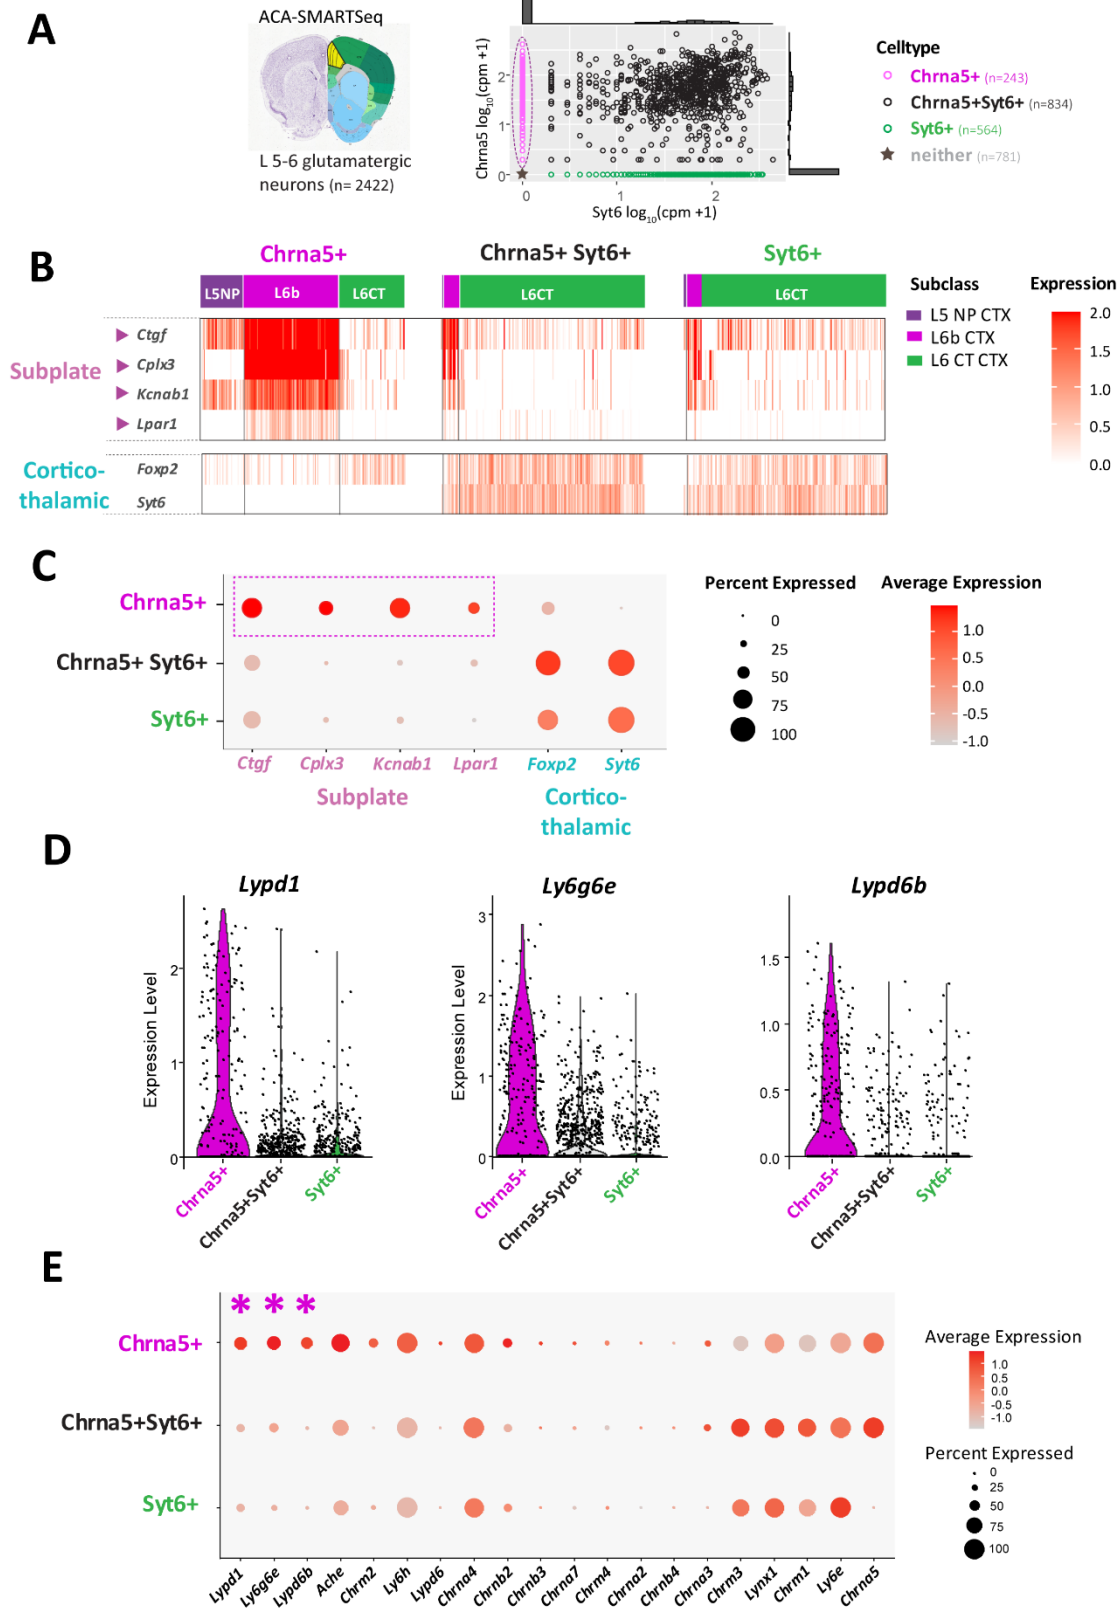



**Figure 4**

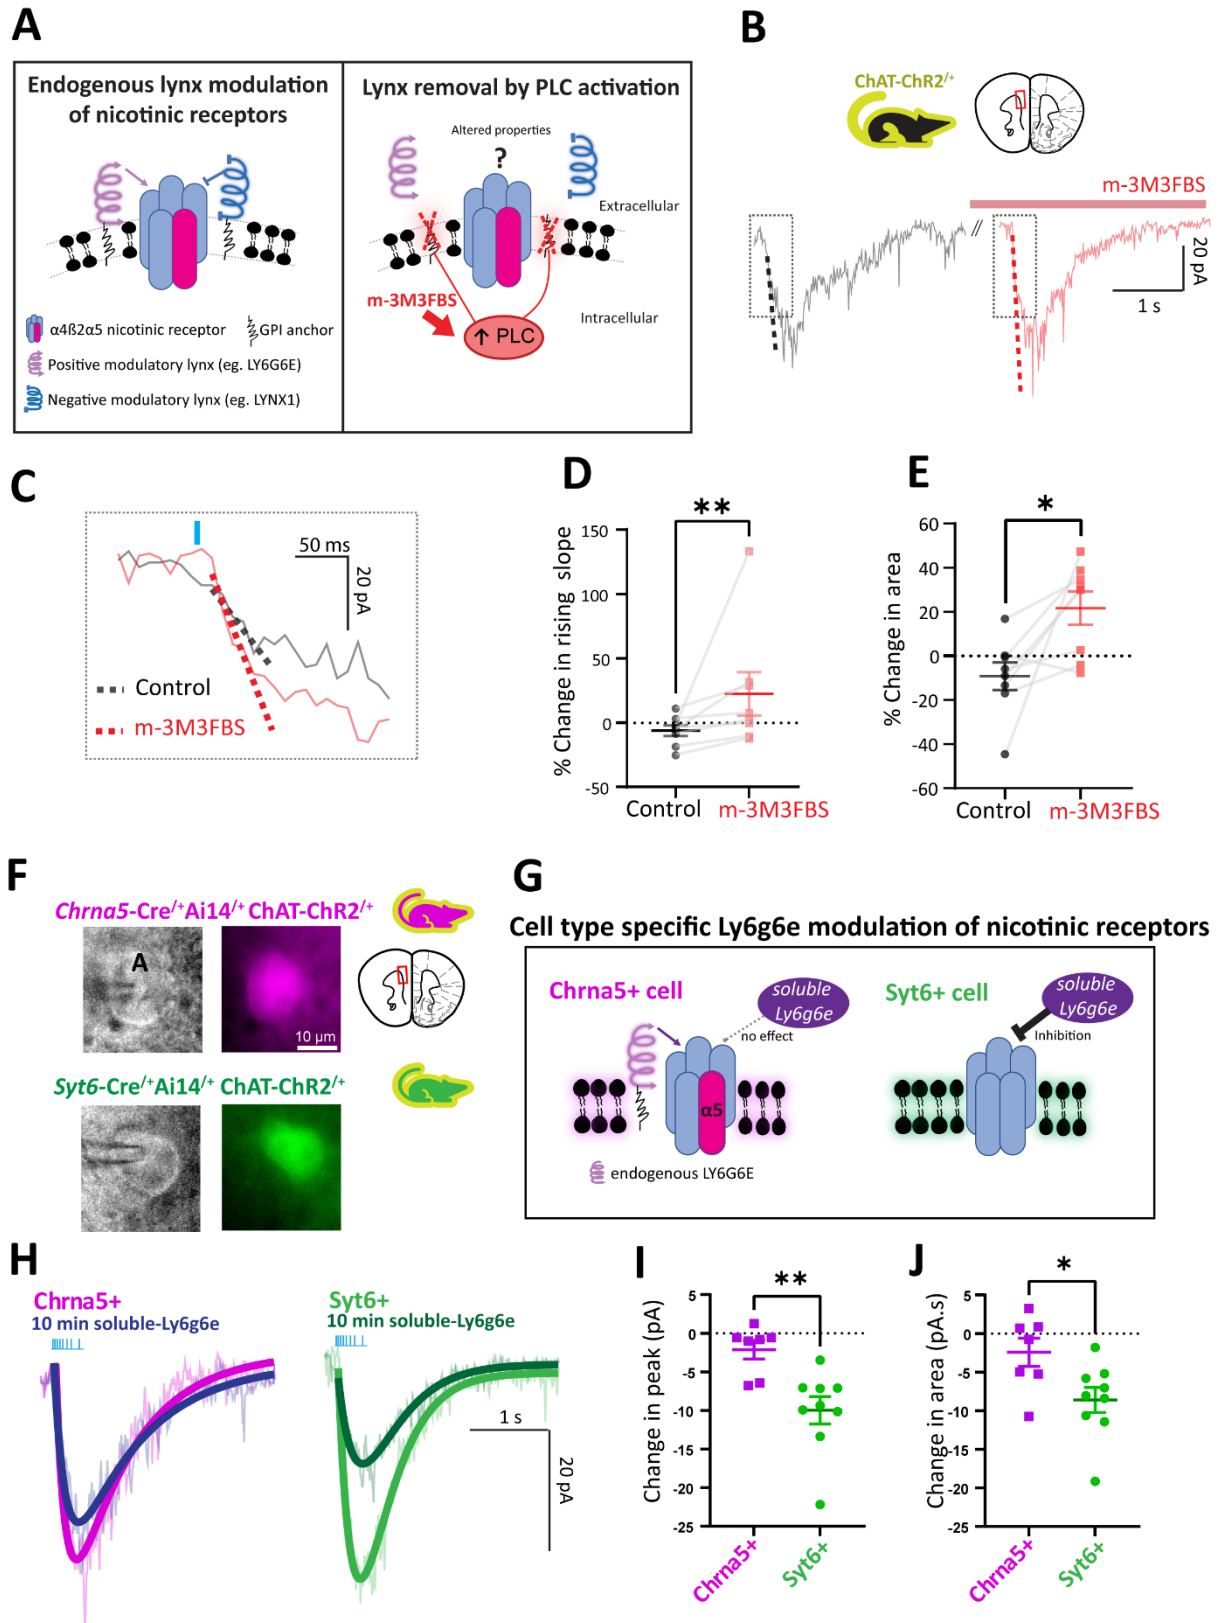

**Figure 5**

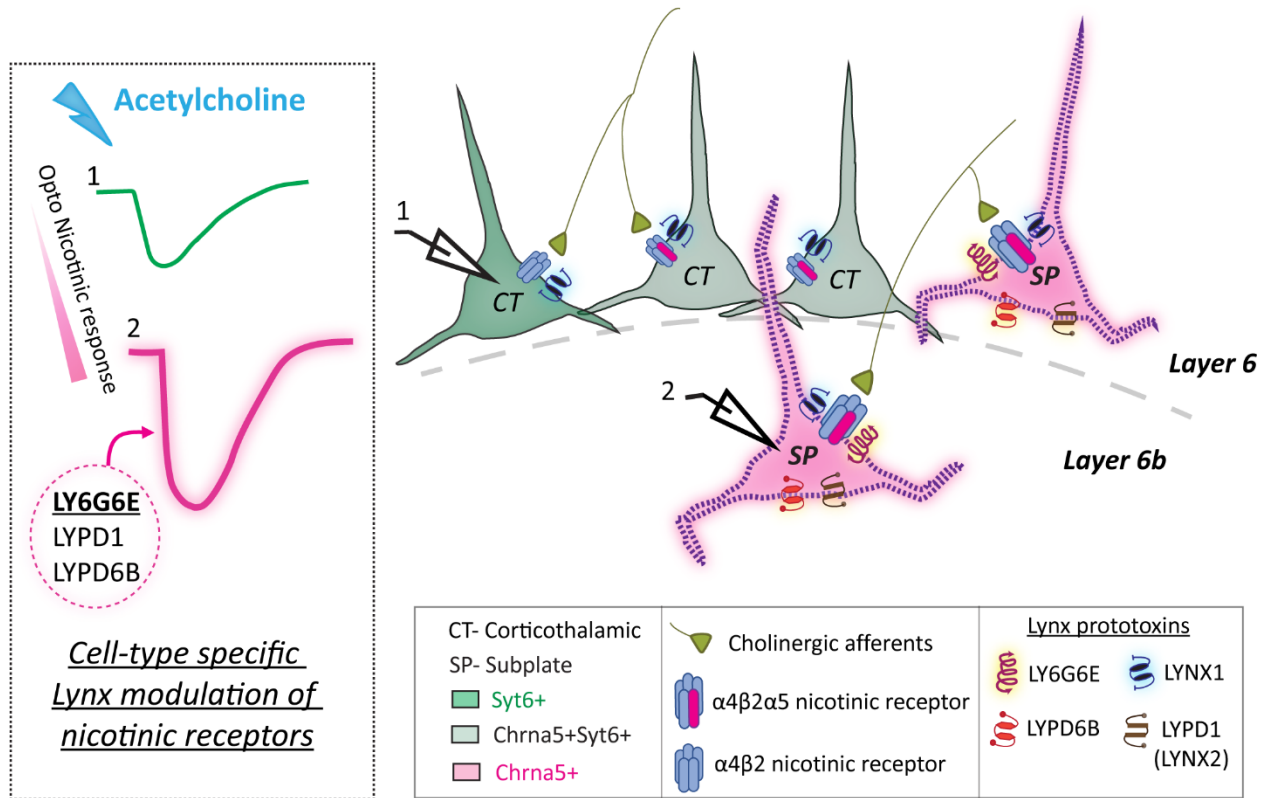

**Table 1**

| <b>Genes</b>    | <b>P value</b> | <b>Chrna5+ cells %</b> | <b>Chrna5+Syt6+ cells %</b> | <b>Adjusted P value</b> | <b>Fold change (Chrna5+/Chrna5+Syt6)</b> |
|-----------------|----------------|------------------------|-----------------------------|-------------------------|------------------------------------------|
| <b>*Cplx3</b>   | 1.16E-43       | 0.535                  | 0.149                       | 3.37E-39                | 5.69                                     |
| <b>*Ctgf</b>    | 1.60E-28       | 0.77                   | 0.568                       | 4.65E-24                | 3.81                                     |
| <i>Ptn</i>      | 3.68E-28       | 0.864                  | 0.758                       | 1.07E-23                | 3.60                                     |
| <b>*Tmem163</b> | 2.12E-44       | 0.51                   | 0.129                       | 6.16E-40                | 2.58                                     |
| <i>Lypd1</i>    | 3.40E-23       | 0.593                  | 0.381                       | 9.88E-19                | 2.55                                     |
| <b>*Kcnab1</b>  | 3.81E-74       | 0.741                  | 0.191                       | 1.11E-69                | 2.51                                     |
| <i>Serpini1</i> | 1.54E-50       | 1                      | 0.993                       | 4.49E-46                | 2.50                                     |
| <i>Hpcal1</i>   | 2.48E-27       | 0.658                  | 0.39                        | 7.20E-23                | 2.47                                     |
| <i>Nrsn2</i>    | 1.89E-30       | 0.864                  | 0.767                       | 5.50E-26                | 2.28                                     |
| <i>Ntm</i>      | 1.83E-56       | 0.889                  | 0.59                        | 5.31E-52                | 2.21                                     |
| <i>Tshz2</i>    | 2.82E-16       | 0.535                  | 0.327                       | 8.20E-12                | 2.17                                     |
| <i>Etv1</i>     | 5.70E-16       | 0.395                  | 0.186                       | 1.66E-11                | 2.16                                     |
| <i>Rcn2</i>     | 5.18E-46       | 0.996                  | 0.984                       | 1.51E-41                | 2.14                                     |
| <i>Olfm3</i>    | 1.67E-44       | 0.897                  | 0.716                       | 4.86E-40                | 2.11                                     |
| <i>Crtac1</i>   | 5.50E-46       | 0.728                  | 0.347                       | 1.60E-41                | 2.04                                     |
| <b>*Ly6g6e</b>  | 2.13E-25       | 0.671                  | 0.434                       | 6.20E-21                | 2.03                                     |
| <i>Adk</i>      | 6.31E-29       | 0.922                  | 0.922                       | 1.83E-24                | 2.00                                     |
| <i>Trp53i11</i> | 2.73E-60       | 0.724                  | 0.222                       | 7.94E-56                | 1.93                                     |
| <i>Cd164</i>    | 6.72E-18       | 0.897                  | 0.882                       | 1.95E-13                | 1.92                                     |
| <i>Dner</i>     | 2.35E-45       | 0.712                  | 0.326                       | 6.82E-41                | 1.85                                     |

**Top 20 differentially expressed genes between Chrna5+ and Chrna5+Syt6+ neuron.** Top 20 differentially expressed genes determined by the FindMarkers function on Seurat ordered by decreasing fold change. Several known subplate neuron markers (highlighted by \*) are the highest enriched genes in Chrna5+ neurons. All differentially expressed genes are listed in supplementary table 4.
